# Supplementary material for: Efficacy, immunogenicity and safety of vaccination in adult patients with autoimmune inflammatory rheumatic diseases: a systematic literature review for the 2019 update of EULAR recommendations
Source: PubMed Central journal article supplement — RMD Open. 2019 Sep 9;5(2):e001035. doi: 10.1136/rmdopen-2019-001035 (PMC6744079; doi:10.1136/rmdopen-2019-001035), 2019-09-09
Supplement: rmdopen-2019-001035supp001.pdf [file rmdopen-2019-001035supp001.pdf]

## Supplementary Tables

Rondaan et al.: Efficacy, immunogenicity and safety of vaccination in adult patients with auto-immune inflammatory rheumatic diseases:  
A systematic literature review for the European League Against Rheumatism evidence-based update of recommendations for vaccination in adult patients with auto-immune inflammatory rheumatic diseases.

Supplementary Table S1. Efficacy, immunogenicity and safety of hepatitis B vaccination in AIIRD patients.

| First author + ref.                  | Year        | Study design  | No. cases                            | Efficacy | Immunogenicity                                    | Safety                                                                            | Influence IS on eff./imm.  | LoE       |      |      |
|--------------------------------------|-------------|---------------|--------------------------------------|----------|---------------------------------------------------|-----------------------------------------------------------------------------------|----------------------------|-----------|------|------|
|                                      |             |               |                                      |          |                                                   |                                                                                   |                            | Eff.      | Imm. | Saf. |
| Intongkam <sup>151</sup>             | 2018        | Cohort        | 46 RA<br>47 RA-DC<br>9 HC            | -        | Seroprotection in 64% RA vs. 100% in HC (p=0.045) | Tolerated well.<br>Overall stable disease, 1 flare after first vaccination        | No                         | -         | 2b   | 4    |
| <i>Franco Salinas</i> <sup>149</sup> | <i>2009</i> | <i>Cohort</i> | <i>20 SpA-anti-TNF<br/>10 SpA-DC</i> | -        | <i>Reduced in SpA-anti-TNF</i>                    | -                                                                                 | <i>Reduced on anti-TNF</i> | <i>NA</i> |      |      |
| <i>Kuruma</i> <sup>148</sup>         | <i>2007</i> | <i>Cohort</i> | <i>28 SLE</i>                        | -        | <i>93% seroprotection</i>                         | <i>11% flares</i>                                                                 | -                          | <i>NA</i> |      |      |
| <i>Erkek</i> <sup>150</sup>          | <i>2005</i> | <i>Cohort</i> | <i>13 Behçet<br/>15 HC</i>           | -        | <i>No difference</i>                              | <i>Three patients oral aphthae<br/>Overall stable disease activity<br/>No SAE</i> | -                          | <i>NA</i> |      |      |
| <i>Elkayam</i> <sup>147</sup>        | <i>2002</i> | <i>Cohort</i> | <i>22 RA<br/>22 RA-DC</i>            | -        | <i>68% seroprotection</i>                         | <i>No flares</i>                                                                  | <i>No</i>                  | <i>NA</i> |      |      |

Articles that were already included in the 2011 version of this SLR, are depicted in italic.

Abbreviations: ref.: reference; No.: number; IS: immunosuppressives; eff.: efficacy; imm.: immunogenicity; LoE: Level of evidence; Saf.: safety; RA: rheumatoid arthritis; DC: disease control; HC: healthy control; SpA: spondyloarthritis; TNF: tumor necrosis factor; NA: not applicable; SLE: systemic lupus erythematosus; SAE: serious adverse events.

Supplementary Table S2. Efficacy, immunogenicity and safety of tetanus toxoid vaccination in AIIRD patients.

| First author + ref.                                                                                     | Year | Study design | No. cases                  | Efficacy | Immunogenicity | Safety                                          | Influence IS on eff./imm.                                            | LoE  |      |      |
|---------------------------------------------------------------------------------------------------------|------|--------------|----------------------------|----------|----------------|-------------------------------------------------|----------------------------------------------------------------------|------|------|------|
|                                                                                                         |      |              |                            |          |                |                                                 |                                                                      | Eff. | Imm. | Saf. |
| Jaeger <sup>51</sup><br><i>Simultaneous tetanus and diphtheria (±pertussis, polio, Hib) vaccination</i> | 2017 | Cohort       | 12 CAPS                    | -        | -              | Local AE in 2 (17%)<br>No fever, no SAE         | -                                                                    | -    | -    | 4    |
| Bingham <sup>110</sup><br><i>Simultaneous tetanus toxoid and pneumococcal vaccination</i>               | 2015 | Cohort       | 54 RA-TCZ+MTX<br>27 RA-MTX | -        | No difference  | Higher incidence of mild/moderate AE in TCZ+MTX | No                                                                   | -    | 2b   | 4    |
| Bingham <sup>88</sup>                                                                                   | 2010 | Cohort       | 69 RA-RTX<br>34 RA-DC      | -        | No difference  | -                                               | No                                                                   | NA   |      |      |
| Kashef <sup>156</sup>                                                                                   | 2008 | Cohort       | 40 SLE<br>60 HC            | -        | No difference  | -                                               | No                                                                   | NA   |      |      |
| Battafarano <sup>100</sup><br><i>Tetanus toxoid, pneumococcal and Hib vaccination</i>                   | 1998 | Cohort       | 73 SLE                     | -        | 90% protection | -                                               | Trend lower response on GC and AZA, not specified for tetanus toxoid | NA   |      |      |
| Devey <sup>154</sup>                                                                                    | 1987 | Cohort       | 24 SLE<br>29 RA<br>33 HC   | -        | No difference  | -                                               | -                                                                    | NA   |      |      |
| Nies <sup>157</sup>                                                                                     | 1980 | Cohort       | 9 SLE                      | -        | Reduced in SLE | -                                               | -                                                                    | NA   |      |      |

|                            |             |               |                                 |   |                      |   |           |           |
|----------------------------|-------------|---------------|---------------------------------|---|----------------------|---|-----------|-----------|
|                            |             |               | <i>9 HC</i>                     |   |                      |   |           |           |
| <i>Abe <sup>155</sup></i>  | <i>1971</i> | <i>Cohort</i> | <i>20 SLE</i><br><i>20 HC</i>   | - | <i>No difference</i> | - | <i>No</i> | <i>NA</i> |
| <i>Denman <sup>7</sup></i> | <i>1970</i> | <i>Cohort</i> | <i>20 RA</i><br><i>39 RA-DC</i> | - | <i>No difference</i> | - | <i>No</i> | <i>NA</i> |

Articles that were already included in the 2011 version of this SLR, are depicted in italic.

Abbreviations: ref.: reference; No.: number; IS: immunosuppressives; eff.: efficacy; imm.: immunogenicity; LoE: Level of evidence; Saf.: safety; Hib: *Haemophilus influenzae* B; CAPS: cryopyrin associated periodic syndrome; (S)AE: serious adverse event(s); RA: rheumatoid arthritis; TCZ: tocilizumab; MTX: methotrexate; RTX: rituximab; DC: disease control; NA; not applicable; SLE: systematic lupus erythematosus; AZA: azathioprine; HC: healthy controls.

Supplementary Table S3. Efficacy, immunogenicity and safety of yellow fever vaccination in AIIRD patients.

| First author + ref.                                                 | Year | Study design | No. cases                                                                             | Efficacy | Immunogenicity                                                                            | Safety                                                            | Influence IS on eff./imm. | LoE  |      |      |
|---------------------------------------------------------------------|------|--------------|---------------------------------------------------------------------------------------|----------|-------------------------------------------------------------------------------------------|-------------------------------------------------------------------|---------------------------|------|------|------|
|                                                                     |      |              |                                                                                       |          |                                                                                           |                                                                   |                           | Eff. | Imm. | Saf. |
| Kernéis <sup>176</sup><br><i>Revaccination in 44% of GC-treated</i> | 2013 | Cohort       | 34 GC-treated:<br>9 RA<br>14 chronic infl. dis.<br>8 RTI<br>3 other<br>68 HC          | -        | Seroprotection in all tested patients (n=20; 9 RA, 8 chronic infl. dis., 3 UTI)           | More moderate/severe local reactions in GC-treated (12 versus 2%) | -                         | -    | 4    | 4    |
| Wieten <sup>174</sup>                                               | 2016 | Case series  | 4 RA<br>2 SSc<br>3 SpA<br>2 IBD<br>1 psoriasis<br>1 MG<br>1 liver Tx<br>1 PG<br>30 HC | -        | No difference in humoral and cellular immunity measures                                   | No reports of fever following vaccination                         | -                         | -    | 4    | 4    |
| Oliveira <sup>175</sup><br><i>Only revaccination</i>                | 2015 | Case series  | 23 RA<br>5 SLE<br>2 SSc<br>1 AS                                                       | -        | Seropositivity in 87% 2 years after revaccination                                         | Mild AE in 4                                                      | -                         | -    | 4    | 4    |
| Scheinberg <sup>177</sup><br><i>Only revaccination</i>              | 2010 | Case series  | 17 RA anti-TNF<br>15 HC                                                               | -        | Trend toward lower antibody response in patients. Negative serology in 1 patient and 1 HC | No AE reported, symptoms attributable to vaccination              | -                         | -    | 4    | 4    |

Abbreviations: ref.: reference; No.: number; IS: immunosuppressives; eff.: efficacy; imm.: immunogenicity; LoE: Level of evidence; Saf.: safety; IS: immunosuppressives, LoE: level of evidence, Eff.: efficacy, Imm.: immunogenicity, Saf.: safety, GC: glucocorticoid; RA: rheumatoid arthritis, SSc: systemic sclerosis, inf.: inflammatory; dis.: disease; RTI: upper respiratory tract infection; HC: healthy control; SSc: systemic sclerosis; SpA: spondyloarthropathy, IBD: inflammatory bowel disease, MG: myasthenia gravis, Tx: transplantation, PG: pyoderma gangrenosum, AS: ankylosing spondylitis, (S)AE: (serious) adverse event, TNF: tumor necrosis factor.

Supplementary Table S4. Efficacy, immunogenicity and safety of human papillomavirus (HPV) vaccination in AIIRD patients.

| First author + ref.                                   | Year         | Study design | No. cases                                                                            | Efficacy | Immunogenicity                                                                      | Safety                                                                         | Influence IS on eff./imm.                        | LoE  |      |      |
|-------------------------------------------------------|--------------|--------------|--------------------------------------------------------------------------------------|----------|-------------------------------------------------------------------------------------|--------------------------------------------------------------------------------|--------------------------------------------------|------|------|------|
|                                                       |              |              |                                                                                      |          |                                                                                     |                                                                                |                                                  | Eff. | Imm. | Saf. |
| Dhar <sup>183</sup> and <sup>184</sup><br><i>qHPV</i> | 2017<br>2018 | Cohort       | 34 SLE                                                                               | -        | 100% seroconversion for HPV16 and HPV18, both in seropositive and seronegative SLE  | No SLE flares                                                                  | -                                                | -    | 2b   | 4    |
| Mok <sup>185</sup> and <sup>182</sup><br><i>qHPV</i>  | 2013<br>2018 | Cohort       | 50 SLE vacc.:<br>- 35 low GC<br>- 24 MMF<br>- 2 CsA<br>- 5 TAC<br>50 SLE DC<br>50 HC | -        | Seroconversion similar in SLE and HC<br><br>After 5 yrs lower GMT for HPV 16 in SLE | AE in SLE similar as in HC<br><br>Flares similar in vaccinated and control SLE | Lower GMT and seroconversion while on MMF and GC | -    | 2b   | 4    |
| Esposito <sup>181</sup><br><i>bHPV</i>                | 2014         | Cohort       | 21 JIA<br>21 HC                                                                      | -        | 100% seroconversion in JIA and HC<br>Lower GMT HPV16 in JIA                         | AE in JIA similar as in HC<br>No increase in JADAS-27                          | -                                                | -    | 2b   | 4    |
| Soybilgic <sup>186</sup><br><i>qHPV</i>               | 2013         | Cohort       | 27 jSLE                                                                              | -        | All but 1 patient seropositive for 4 HPV types                                      | 2 flares<br>No increase in SLEDAI                                              | -                                                | -    | 4    | 4    |

Abbreviations: ref.: reference; No.: number; IS: immunosuppressives; eff.: efficacy; imm.: immunogenicity; LoE: Level of evidence; Saf.: safety; IS: immunosuppressives, LoE: level of evidence, Eff.: efficacy, Imm.: immunogenicity, Saf.: safety; qHPV: quadrivalent HPV vaccine; bHPV: bivalent HPV vaccine; (j)SLE: (juvenile) systemic lupus erythematosus; vacc.: vaccinated; GC: glucocorticoid; MMF: mycophenolate mofetil; CsA: cyclosporin A; TAC: tacrolimus; DC: disease control; HC: healthy control; GMT: geometric mean titre; AE: adverse events; JIA: juvenile idiopathic arthritis; JADAS-27: 27-joint Juvenile Arthritis Disease Activity Score; SLEDAI: SLE Disease Activity Index.

Supplementary Table S5. Efficacy, immunogenicity and safety of tick-borne encephalitis vaccination in AIIRD patients.

| First author + ref.     | Year | Study design | No. cases              | Efficacy | Immunogenicity                                         | Safety | Influence IS on eff./imm.           | LoE  |      |      |
|-------------------------|------|--------------|------------------------|----------|--------------------------------------------------------|--------|-------------------------------------|------|------|------|
|                         |      |              |                        |          |                                                        |        |                                     | Eff. | Imm. | Saf. |
| Hertzell <sup>195</sup> | 2016 | Cohort       | 65 RA<br>1 AS<br>56 HC | -        | Lower in RA.<br>Seroprotection in 39%<br>RA vs. 79% HC | No SAE | Possibly reduced in<br>MTX+anti-TNF | -    | 2b   | 4    |

Abbreviations: ref.: reference; No.: number; IS: immunosuppressives; eff.: efficacy; imm.: immunogenicity; LoE: Level of evidence; Saf.: safety; IS: immunosuppressives, LoE: level of evidence, Eff.: efficacy, Imm.: immunogenicity, Saf.: safety; RA: rheumatoid arthritis; AS: ankylosing spondylitis; HC: healthy control; SAE: serious adverse event; MTX: methotrexate; TNF: tumor necrosis factor.
