# Supplementary material for: Efficacy, immunogenicity and safety of vaccination in adult patients with autoimmune inflammatory rheumatic diseases: a systematic literature review for the 2019 update of EULAR recommendations
Source: PubMed Central journal article supplement — RMD Open. 2019 Sep 9;5(2):e001035. doi: 10.1136/rmdopen-2019-001035 (PMC6744079; doi:10.1136/rmdopen-2019-001035), 2019-09-09
Supplement: rmdopen-2019-001035supp002.pdf [file rmdopen-2019-001035supp002.pdf]

| Name first author                                     | Year of publication | Country        |
|-------------------------------------------------------|---------------------|----------------|
| <b>SEASONAL (TRIVALENT)<br/>INFLUENZA VACCINATION</b> |                     |                |
| Subesinghe                                            | 2018                | Multi          |
| Huang                                                 | 2017                | Multi          |
| Burmester                                             | 2017                | Multi          |
| Hua                                                   | 2014                | Multi          |
| Park                                                  | 2018                | Korea          |
| Park                                                  | 2017                | Korea          |
| Winthrop - Study A                                    | 2016                | USA and Poland |
| Winthrop - Study B                                    | 2016                | USA and Poland |
| Kivitz                                                | 2014                | USA            |
| Chen                                                  | 2018                | Taiwan         |
| Jain                                                  | 2017                | India          |
| Alten                                                 | 2016                | Multi          |
| Luque Ramos                                           | 2016                | Germany        |
| Kogure                                                | 2014                | Japan          |
| Milanetti                                             | 2014                | Italy          |
| Kobashigawa                                           | 2013                | Japan          |

|                              |      |             |
|------------------------------|------|-------------|
| Milanovic                    | 2013 | Serbia      |
| Tsuru - <i>abstract only</i> | 2014 | Japan       |
| Mori                         | 2012 | Japan       |
| Kogure                       | 2012 | Japan       |
| Arad                         | 2011 | Israel      |
| Kobie                        | 2011 | USA         |
| Rehnberg                     | 2010 | Sweden      |
| Salemi                       | 2010 | Italy       |
| Huang                        | 2016 | Multi       |
| Pugès                        | 2016 | Multi       |
| Liao                         | 2016 | Multi       |
| Chang                        | 2016 | Taiwan      |
| Launay                       | 2013 |             |
| Vista                        | 2012 | USA         |
| Crowe                        | 2011 | USA         |
| Wallin                       | 2009 | Brazil      |
| Jaeger                       | 2017 | Switzerland |
| Caso                         | 2016 | Italy       |
| Jeffs                        | 2015 | Australia   |
| Polachek                     | 2015 | Israel      |

|                                                                 |      |             |
|-----------------------------------------------------------------|------|-------------|
| Litinsky                                                        | 2012 | Israel      |
| Kostianovsky                                                    | 2012 | France      |
|                                                                 |      |             |
| <b>MONOVALENT (H1N1)<br/>PANDEMIC INFLUENZA<br/>VACCINATION</b> |      |             |
| Kapetanovic                                                     | 2014 | Sweden      |
| Ribeiro                                                         | 2013 | Brazil      |
| Adler                                                           | 2012 | Switzerland |
| Franca                                                          | 2012 | Brazil      |
| Iwamoto                                                         | 2012 | Japan       |
| Saad                                                            | 2011 | Brazil      |
| Gabay                                                           | 2011 | Switzerland |
| Miraglia                                                        | 2011 | Brazil      |
| Elkayam                                                         | 2011 | Israel      |
| Ribeiro                                                         | 2011 | Brazil      |
| Müller                                                          | 2013 | Switzerland |
| Borba                                                           | 2012 | Brazil      |
| Lu                                                              | 2011 | Taiwan      |
| Urowitz                                                         | 2011 | Canada      |
| Mathian                                                         | 2011 | France      |

|                |      |        |
|----------------|------|--------|
| Brauner        | 2017 | Sweden |
| Sampaio-Barros | 2017 | Brazil |
| De Medeiros    | 2014 | Brazil |
| Miossi         | 2013 | Brazil |
| Shinjo         | 2012 | Brazil |
|                |      |        |

| Years of data inclusion                                   | Type of study                   | Vaccine                                   | Adjuvant   |
|-----------------------------------------------------------|---------------------------------|-------------------------------------------|------------|
|                                                           |                                 |                                           |            |
| Search October 2016                                       | Meta-analysis                   | Influenza (and pneumococcal)              | NR         |
| Search August 2016                                        | Meta-analysis                   | Influenza                                 | NR         |
| "Data reported are collected from 1 February 2004 through | Meta-analysis                   | Influenza                                 | NR         |
| Search March 2013                                         | Meta-analysis                   | Influenza (and pneumococcal)              | NR         |
| 2015-16                                                   | RCT                             | Trivalent influenza                       | NR         |
| 2016-17                                                   | RCT                             | Trivalent influenza                       | NR         |
| 2011-12                                                   | Cohort                          | Trivalent influenza                       | NR         |
| 2011-12                                                   | Cohort                          | Trivalent influenza                       | NR         |
| 2009-11                                                   | RCT                             | Trivalent influenza                       | NR         |
| 2000-2010                                                 | Cohort (retrospective database) | Trivalent influenza                       | NR         |
| 2014                                                      | Cohort                          | Trivalent influenza                       | No         |
| NR                                                        | Cohort                          | Trivalent influenza                       | NR         |
| 2009-13                                                   | Cohort - proclaim data claims   | Influenza                                 | NR         |
| 2011-12                                                   | Cohort                          | Influenza                                 | No         |
| 2009                                                      | Cohort                          | Both seasonal and pandemic H1N1 influenza | Yes (MF59) |
| 4 seasons between 2000-2007                               | Cohort                          | Trivalent influenza                       | No         |

|                     |                                 |                                         |                   |
|---------------------|---------------------------------|-----------------------------------------|-------------------|
| 2009-10             | Cohort                          | Trivalent influenza                     | No                |
| NR                  | Cohort                          | Trivalent influenza                     | NR                |
| 2012                | Cohort                          | Trivalent influenza                     | NR                |
| 2010-11             | Cohort                          | Trivalent influenza                     | No                |
| 2009                | Cohort                          | Trivalent influenza                     | No                |
| 2006-10             | Cohort                          | Trivalent influenza                     | NR                |
| 2007-8              | Cohort                          | Trivalent influenza (also pneumococcal) | NR                |
| 2005-6              | Cohort                          | Trivalent influenza                     | NR                |
| Search October 2015 | Meta-analysis                   | Influenza                               | NR                |
| Search May 2015     | Meta-analysis                   | Influenza (and pneumococcal)            | NR                |
| Search April 2015   | Meta-analysis                   | Influenza                               | MF59 in one study |
| 2001-2011           | Cohort (retrospective database) | Influenza                               | NR                |
| 2009-2010           | Cohort                          | Trivalent influenza                     | No                |
| 2005-2009           | Cohort                          | Trivalent influenza                     | No                |
| 2005-2008           | Cohort                          | Trivalent influenza                     | No                |
| 2007                | Cohort                          | Trivalent influenza                     | No                |
| 2010-2015           | Cohort                          | Trivalent influenza (and pneumococcal)  | NR                |
| 2012-14             | Cohort                          | Trivalent influenza                     | NR                |
| 2007                | Cohort                          | Trivalent influenza                     | No                |
| 2012-2013           | Cohort                          | Trivalent influenza                     | NR                |

|           |             |                                           |                               |
|-----------|-------------|-------------------------------------------|-------------------------------|
| 2009-2010 | Cohort      | Trivalent influenza                       | NR                            |
| 2009-10   | Cohort      | Both seasonal and pandemic H1N1 influenza | No                            |
|           |             |                                           |                               |
|           |             |                                           |                               |
| 2009      | Cohort      | H1N1                                      | Yes (AS03)                    |
| 2009      | Cohort      | H1N1                                      | No                            |
| 2009      | Cohort      | H1N1                                      | Yes (AS03)                    |
| 2009      | Cohort      | H1N1                                      | No                            |
| 2009      | Cohort      | H1N1                                      | Mostly no (author's response) |
| 2010      | Cohort      | H1N1                                      | No                            |
| 2009      | Cohort      | H1N1                                      | Yes (AS03)                    |
| 2010      | Cohort      | H1N1                                      | No                            |
| 2009-2010 | Cohort      | H1N1                                      | Yes (MF59)                    |
| 2009      | Cohort      | H1N1                                      | No                            |
| 2009      | Case series | H1N1                                      | Yes (AS03)                    |
| 2009      | Cohort      | H1N1                                      | No                            |
| 2009      | Cohort      | H1N1                                      | No                            |
| 2009-2010 | Cohort      | H1N1                                      | Both with and without         |
| 2009      | Cohort      | H1N1                                      | No                            |

|      |        |      |     |
|------|--------|------|-----|
| NR   | Cohort | H1N1 | Yes |
| 2010 | Cohort | H1N1 | No  |
| 2009 | Cohort | H1N1 | No  |
| 2010 | Cohort | H1N1 | No  |
| 2009 | Cohort | H1N1 | No  |
|      |        |      |     |



| Type of AIIRD | Number of participants                                                 | Age in years: mean (SD) or median ([interquartile] range) | % Women                             |
|---------------|------------------------------------------------------------------------|-----------------------------------------------------------|-------------------------------------|
| RA            | Review + Meta-analysis including 7 studies on influenza vaccination, 2 | Reported separately for all studies                       | Reported separately for all studies |
| RA            | 13 studies with 886 RA and 685 HC                                      | 49,8. Patients of any age could be included!              | 70.4                                |
| RA            | Total in analysis: 171 RA-anti-TNF vacc.                               | Not specified for subpopulation                           | Not specified for subpopulation     |
| RA            | Review included 12 studies with a total of                             | 56.9 (5.27) (pts could be included regardless of          | 62                                  |
| RA            | MTX 156<br>MTX hold 2 w 160                                            | 52.2 (9.5)<br>53.7 (10.3)                                 | 82.7<br>87.5                        |
| RA            | MTX 54<br>hold 4w bef 44                                               | 59.1 (13.1)<br>58.5 (13.3)                                | 83.3<br>88.6                        |
| RA            | Tofacitinib 102<br>Placebo 98                                          | 53 (25–82)<br>53 (23–77)                                  | 73.5<br>80.6                        |
| RA            | Cont. Tofa 92<br>Stop Tofa 91                                          | 57.0 (28–78)<br>54.0 (24–72)                              | 84.8<br>86.8                        |
| RA            | Certolizumab pegol 110<br>(68% + MTX)                                  | 53.1 (11.8)<br>52.7 (11.1)                                | 83.6<br>76.3                        |
| RA            | 3748 RA<br>3748 RA non-vac                                             | 59.8 (12)<br>59.5(11.8)                                   | 79.4<br>79.4                        |
| RA            | MTX 51<br>Naïve 51                                                     | 49.4 (10.5)<br>43.4 (12.2)                                | 98<br>84.3                          |
| RA            | RA 184                                                                 | 45.7 (13.8)                                               | 85.6                                |
| RA            | RA: 111,482<br>HC: 555,410                                             | 66.2 (13.7)<br>66.2 (13.7)                                | 79.7<br>79.7                        |
| RA            | RA 57                                                                  | 60.2 (13.2)                                               | 91.2                                |
| RA            | 30 RA<br>13 HC                                                         | 50 (10)<br>41.8 (12)                                      | 76<br>77                            |
| RA            | Ranged from 3661 to 5175. Vaccine coverage                             | Mean between 59-60 range 50-68                            | Between 82.5 and 83.9               |

|                                               |                                                                          |                                                                        |                                           |
|-----------------------------------------------|--------------------------------------------------------------------------|------------------------------------------------------------------------|-------------------------------------------|
| SLE, RA, SjS                                  | SLE19<br>RA14<br>6:612                                                   | 52 (34)<br>58.68 (11.18)<br>61.38 (9.62)                               | 86                                        |
| RA and Castleman's disease                    | TCZ 28<br>TNF 15<br>DMARDs 24                                            | 49 (32-63)<br>52 (22-72)<br>54 (25-77)                                 | 82<br>80<br>82                            |
| RA                                            | MTX 65<br>TCZ 62<br>TCZ + MTX 40                                         | 67 (65.0-68.9)<br>65.2 (61.6-68.8)<br>63.8 (59.8-65.0)                 | 83<br>82<br>80                            |
| RA                                            | 45                                                                       | 56.2 (13.5)                                                            | 93                                        |
| RA                                            | RTX 29<br>DMARDs 29<br>HC 16                                             | 61.8 (9.7)<br>61.2 (16.7)<br>44.5 (15.2)                               | 82<br>58<br>87                            |
| RA                                            | All RA 164<br>RA disease control 33<br>RA + MTX 70                       | 57.1 (13.8)<br>58.4 (12.2)<br>55.4 (12.2)                              | 64<br>77<br>82                            |
| RA                                            | RTX 36w 11<br>Pre-RTX 1w 8<br>RA disease controls 10                     | 60 (7.8)<br>65.4 (11.5)<br>62.5 (12.0)                                 | 90<br>87<br>70                            |
| RA                                            | RA 22<br>HC 10                                                           | 53 (3)                                                                 | 82.1                                      |
| SLE                                           | 15 studies with 1057 SLE and 594 HC                                      | Mean 35.1. Also includes juvenile SLE!                                 | 85.5                                      |
| SLE                                           | 17 studies for influenza (1598 pts, 800 HC), 3 for pneumococcal (67 pts) | >18 years                                                              | NR                                        |
| SLE                                           | 18 studies with 1966 SLE and 1116 HC                                     | Data only given for each separate article. Three studies that included | Data only given for each separate article |
| SLE                                           | 1765 vac. SLE<br>8360 non vac SLE                                        | 46.2 (17.7)<br>37.3 (13.2)                                             | 87<br>88.7                                |
| SLE                                           | 27 (Analysis divided into three groups according to treatment group A)   | Median 42,0 (range 25-74)                                              | 96.3                                      |
| SLE                                           | SLE 101<br>HC 101                                                        | 43.9 (14)<br>43.9 (14)                                                 | 92<br>92                                  |
| SLE                                           | SLE 72<br>HC 72                                                          | 43 (14)<br>43 (14)                                                     | 92                                        |
| SLE                                           | SLE 47<br>HC 27                                                          | 40.57 (9.9)<br>34.7 (12.0)                                             | 97.9<br>85.2                              |
| CAPS (cryopyrin-associated periodic syndrome) | CAPS 68 - 107 influenza vaccine injections in 55 CAPS                    | 36 (18)                                                                | 55                                        |
| PsA                                           | 25 vac<br>25 non vac                                                     | 57.96 (7.31)<br>56.48 (7.95)                                           | 49<br>44                                  |
| ANCA-associated vasculitis (AAV)              | AAV 24<br>AAV non vac 67<br>HC 52                                        | 62 (25-86)<br>65 (55-76)                                               | 45.8<br>42.5                              |
| PsA                                           | PsA 63 (+ 4 psoriasis)<br>HC 30                                          | 50 (14.2)<br>43.3 (13)                                                 | 55<br>63                                  |

|                                                                    |                                                      |                                                                     |                                          |
|--------------------------------------------------------------------|------------------------------------------------------|---------------------------------------------------------------------|------------------------------------------|
| SSc (Systemic sclerosis)                                           | SS 26<br>HC 16                                       | 51.7 (12.9)<br>44.5 (15.3)                                          | 85<br>88                                 |
| SSc, vasc, Sj, SLE                                                 | ALL 199<br>Vasc 74<br>SSc 22                         | NR                                                                  | NR                                       |
|                                                                    |                                                      |                                                                     |                                          |
|                                                                    |                                                      |                                                                     |                                          |
| RA + SpA                                                           | ALL<br>RA MTX 50<br>RA anti-TNF 28                   | 57 (23 to 87)<br>62.3 (26 to 87)<br>62.4 (22 to 86)                 | 64<br>78<br>84                           |
| RA                                                                 | 11 ABA (6 + MTX)<br>33 MTX (disease<br>control)      | 55 (25-75)<br>52 (27-80)<br>53 (27-80)                              | 100<br>88<br>76                          |
| RA, SpA, Vasc, CTD                                                 | RA 47<br>SpA 59<br>Vasc 15                           | RA% <40: 17, ≥40 to<br><60: 32, ≥60: 51; SpA%<br>40-59: 22, ≥60: 54 | 81<br>39<br>40                           |
| RA, SpA                                                            | Anti-TNF:<br>- RA 41<br>- SpA 57                     | Anti-TNF 45.1 (11.8)<br>AIIRD DMARDs 46.5<br>(19.6)                 | Anti-TNF 50<br>AIIRD DMARDs 55.7<br>46.6 |
| RA                                                                 | 89 RA<br>14 HC                                       | 67 (29-90)                                                          | 91                                       |
| SLE, RA, AS, SSc, PsA<br>PsA, BD, MCTD, PAPS<br>DM, SS, TA, BM, WC | ALL AIIRD 1668<br>HC 234<br>SLE 572                  | 47,1 (14.1)<br>38.7 (12.5)                                          | 80.4<br>65.8                             |
| RA, SpA, vasc                                                      | 173 AIIRD*<br>138 HC<br>*(82 RA, 45 SpA, 46<br>Vasc) | 53.4 (41.9-63.8)<br>NA                                              | 65.3<br>57.2                             |
| RA, JIA and non-AIIRD                                              | RA 260<br>HC 149<br>(JIA 82)                         | 58 (24-83)<br>68 (60-89)                                            | 85.7<br>69.1                             |
| RA, SLE, PsA, AS                                                   | RA 41<br>SLE 21<br>PsA 17                            | 46.5 (12.1)<br>41.7 (11.5)<br>48.5 (11.8)                           | 62<br>80<br>58                           |
| RA                                                                 | 340 RA<br>234 HC                                     | 55.8 (11.5)<br>36.63 (12.5)<br>Cisq. diff.                          | 86.7<br>66.8                             |
| RA+ Sjögren's syndrome                                             | 16 RA + SjS                                          | 24-65                                                               | 87                                       |
| SLE                                                                | SLE 555<br>HC 170                                    | 36.7 (12.2)<br>38.7 (13.2)                                          | 93<br>91                                 |
| SLE                                                                | SLE 21<br>HC 15                                      | 34.4 (11.8)<br>39.4 (13.9)                                          | 95.2<br>67.7                             |
| SLE                                                                | 103 SLE; 51 adj, 52<br>nonadj                        | 43.9 (15.2)                                                         | 91.3                                     |
| SLE                                                                | SLE 111                                              | 35.2 (10.6)                                                         | 91.9                                     |

|                    |                                 |                            |              |
|--------------------|---------------------------------|----------------------------|--------------|
| Sjogren's syndrome | SjS 14<br>HC 18                 | 54<br>48                   | 100<br>100   |
| SSc                | SS 92<br>HC 92                  | 11.2 (7.3)<br>11.2 (7.3)   | 91           |
| PAPS               | PAPS 45<br>HC 33                | 45.6 (10.3)<br>41 (10.4)   | 76<br>76     |
| MCTD               | MCTD 69<br>HC 69                | 48.6 (12.6)<br>48.6 (12.6) | 95.6<br>96.6 |
| IM                 | IM 58 (37 DM + 21 PM)<br>HC 118 | 43.1 (9.9)<br>43.8 (8.4)   | 75.9<br>77   |
|                    |                                 |                            |              |

| Disease duration in years: mean (SD) or median ([interquartile]) | Follow-up                                                                     | Medication                                                                 | Outcome (efficacy, immunogenicity, safety) |
|------------------------------------------------------------------|-------------------------------------------------------------------------------|----------------------------------------------------------------------------|--------------------------------------------|
|                                                                  |                                                                               |                                                                            |                                            |
| Reported separately for all studies                              | Vaccine response assessed 3-6 wks postvaccination                             | MTX: 5 influenza studies incl. 350 RA and 437 HC.                          | Immunogenicity                             |
| 14.9                                                             | NR                                                                            | Varying                                                                    | Immunogenicity, safety                     |
| Not specified for subpopulation                                  | NR                                                                            | Adalimumab (all)                                                           | Safety, immunogenicity                     |
| Inclusion regardless of disease duration                         | 3-6w                                                                          | Mainly MTX, TNF $\alpha$ , RTX. For influenza: MTX in 222, anti-TNF in 200 | Immunogenicity                             |
| 6.8 (6.5)<br>6.9 (6.2)                                           | 4w                                                                            | MTX, two groups of discontinued or continued use                           | Immunogenicity, safety                     |
| 5.2 (4.5)<br>6.1 (4.9)<br>4.9 (4.4)                              | 4w                                                                            | MTX                                                                        | Immunogenicity, safety                     |
| NR                                                               | 4w                                                                            | Tofacitinib, MTX                                                           | Immunogenicity                             |
| NR                                                               | 4w                                                                            | Tofacitinib, MTX                                                           | Immunogenicity                             |
| 7.4 (8.1)<br>7.9 (8.4)                                           | 4w                                                                            | Certolizumab pegol, MTX                                                    | Immunogenicity, safety                     |
| NR                                                               | End of the influenza season of that year, or subsequent withdrawal from study | Prednisolone, MTX, RTX, Etanercept and adalimumab                          | Efficacy                                   |
| 60 (24-96)                                                       | 4-6w                                                                          | MTX                                                                        | Immunogenicity, safety                     |
| NR                                                               | 4w                                                                            | ABT + MTX                                                                  | Immunogenicity                             |
| NR                                                               | NA                                                                            | NR                                                                         | Efficacy                                   |
| NR                                                               | 4w                                                                            | Biologics, MTX, tacrolimus, GC, SSZ                                        | Immunogenicity, safety                     |
| 7.3 (6.3)                                                        | 21d                                                                           | MTX + anti-TNF or ABT                                                      | Immunogenicity, safety                     |
| Median ranged 8-10. Range from 4 to 17                           | 6 months during 4 seasons                                                     | DMARDs, SSZ, bucillamine, MTX, GC, biologics                               | Efficacy                                   |

|                                                               |                                       |                                                            |                                  |
|---------------------------------------------------------------|---------------------------------------|------------------------------------------------------------|----------------------------------|
| NR                                                            | 10w                                   |                                                            | Efficacy, immunogenicity, Safety |
| 9.2(3-23)<br>14.7(4-34)<br>10.2(4-22)                         | 4.8.12 w                              | TCZ, anti-TNF                                              | Immunogenicity, safety           |
| 9.8 (7.7 to 11.9)<br>14.6 (11.5 to 17.7)<br>7.5 (5.8 to 9.2)  | 4-6w                                  | TCZ                                                        | Immunogenicity, safety           |
| 12.2 (14.1)                                                   | 4w                                    | MTX, SZP                                                   | Immunogenicity                   |
| 9.5 (1-40)<br>9 (0.3-41)                                      | 4-6w                                  | RTX, DMARDs                                                | Immunogenicity, safety           |
| 57.1 (13.8)<br>58.4 (12.2)<br>55.4 (12.2)                     | 4w                                    | MTX, anti-TNF                                              | Immunogenicity                   |
| 17.3 (13.1)<br>8.6 (5.5)<br>7.4 (4.6)                         | 4w                                    | Rituximab                                                  | Immunogenicity                   |
| NR                                                            | 4w immunogenicity, safety 4w and 180d | NR                                                         | Immunogenicity, safety           |
| Mean 8.9 years                                                | NR                                    | Varying                                                    | Immunogenicity, safety           |
| NR                                                            | 3-6w                                  |                                                            | Immunogenicity, safety           |
| NR                                                            | 3-6w                                  | "Seven studies showed that drugs such as abataceptin"      | Immunogenicity, safety           |
| Vacc: NR but must be within 0 to 10 years, 11 years, 12 years | NR                                    | CS                                                         | Efficacy                         |
| NR                                                            | 30d                                   | One did not receive immunosuppressive drugs, five received | Immunogenicity, safety           |
| NR                                                            | 12w                                   | NR                                                         | Safety                           |
| NR                                                            | 12w                                   | HCO, GC                                                    | Immunogenicity, safety           |
| 8.6 (5.4)                                                     | 6w                                    | 23 GC, 8 MTX, 9 AZA                                        | Immunogenicity, safety           |
| 30 (19)                                                       | NA                                    | Canakinumab                                                | Safety                           |
| 12 (5)<br>12.6 (6)                                            | 4/12 w                                | TNF                                                        | Safety                           |
| 2 (1-7)<br>4.5 (1-15)                                         | 6m                                    | AZA, Cyc, MMF, GC                                          | Immunogenicity, safety           |
| PsA median 8, range 1-40                                      | 4-6w                                  | 55.2% anti-TNF, 31.3% DMARDs                               | Immunogenicity, safety           |

|                                                     |                  |                                                                   |                        |
|-----------------------------------------------------|------------------|-------------------------------------------------------------------|------------------------|
| 8,29 (6,28)                                         | 6w               | IS, GC                                                            | Immunogenicity, safety |
| NR                                                  | 6m               | IS; biologicals                                                   | Immunogenicity, safety |
|                                                     |                  |                                                                   |                        |
|                                                     |                  |                                                                   |                        |
| 16.0 (1 to 55)<br>12.5 (1 to 41)<br>21.1 (2 to 46)  | 4-6 w            | TNF, MTX, RTX, TCZ,<br>ABA                                        | Immunogenicity, safety |
| 17 (8-28)<br>12 (1-34)                              | 21d              | ABA, MTX                                                          | Immunogenicity, safety |
| NR                                                  | 6m               | Glucocorticoids,<br>DMARD incl MTX,TNFi,<br>ABA, RTX              | Immunogenicity, safety |
| Anti-TNF 18.4 (10.1)<br>AIIRD DMARDs 15.6<br>(10.4) | 21d              | Anti-TNF, DMARDs in<br>disease controls                           | Immunogenicity, safety |
|                                                     | 3-6w             | Glucocorticoids, MTX,<br>leflunomide,<br>minocycline, tofacitinib | Immunogenicity         |
| NR                                                  | 3w               | Glucocorticoids, IS                                               | Immunogenicity, safety |
| 5 (2-14)                                            | 4+8w             | DMARDs, RTX, TNF, IS ,<br>GC                                      | Immunogenicity, safety |
| NR                                                  | 3w               | NR                                                                | Immunogenicity, safety |
| 9 (0.5-54)<br>11 (3-57)<br>12 (1-20)                | 4-6w             | MTX, leflunomide, anti-<br>TNF, HCQ,Pred                          | Immunogenicity, safety |
| 16.7 (10.4)                                         | 21d              | MTX, TNF ,Lef, GC                                                 | Immunogenicity, safety |
|                                                     | 4+4w             | RTX                                                               | Immunogenicity, safety |
| 13.0 (8.9)                                          | 21d              | IS, CS, HCQ                                                       | Immunogenicity, safety |
| NR                                                  | 6m               | NR                                                                | Immunogenicity, safety |
| 14.2 (11)                                           | 3m               | GC, HCQ, IS                                                       | NA                     |
| 10.3±8                                              | 21d, 42d, 6m,12m | MMF, AZA                                                          | Immunogenicity, safety |

|            |     |                          |                        |
|------------|-----|--------------------------|------------------------|
| NR         | 45d |                          | Safety, immunogenicity |
| 11.2 (7.3) | 3w  | IS, MTX, AZA<br>CYC, MMF | Immunogenicity, safety |
| NR         | 6m  |                          | Safety                 |
| 12.9 (8.9) | 21d | IS,CS, HCQ               | Immunogenicity, safety |
| 7.3 (6.3)  | 21d | IS, GC, MTX, AZA         | Immunogenicity, safety |
|            |     |                          |                        |



| Type of study Oxford Centre - Immunogenicity | Type of study Oxford Centre - Efficacy | Type of study Oxford Centre - Safety | Other comments |
|----------------------------------------------|----------------------------------------|--------------------------------------|----------------|
|                                              |                                        |                                      |                |
| 2a                                           | NA                                     | NA                                   |                |
| 2a                                           | NA                                     | 2a                                   |                |
| NA                                           | 2a                                     | NA                                   |                |
| 2a                                           | NA                                     | NA                                   |                |
| 1-2b                                         | NA                                     | 2b                                   |                |
| 1-2b                                         | NA                                     | 2b                                   |                |
| 2b                                           | NA                                     | NA                                   |                |
| 2b                                           | NA                                     | NA                                   |                |
| 2b                                           | NA                                     | 4                                    |                |
| NA                                           | 2b                                     | NA                                   |                |
| 2b                                           | NA                                     | 4                                    |                |
| 2b                                           | NA                                     | NA                                   |                |
| NA                                           | 5                                      | NA                                   |                |
| 2b                                           | NA                                     | 4                                    |                |
| 2b                                           | NA                                     | 4                                    |                |
| NA                                           | 2b                                     | NA                                   |                |

|    |    |    |                                                        |
|----|----|----|--------------------------------------------------------|
| 2b | 4  | 4  |                                                        |
| 2b | NA | 4  |                                                        |
| 2b | NA | 4  |                                                        |
| 4  | NA | 4  | Numbers in tables and text are inconsistent            |
| 2b | NA | 4  |                                                        |
| 2b | NA | NA |                                                        |
| 4  | NA | NA |                                                        |
| 2b | NA | 4  |                                                        |
| 2a | NA | 2a | Also includes juvenile SLE studies                     |
| 2a | NA | 2a |                                                        |
| 2a | NA | 2a |                                                        |
| NA | 2b | NA |                                                        |
| 4  | NA | 4  |                                                        |
| NA | NA | 4  |                                                        |
| 4  | NA | 4  | Focuses on differences between low and high responders |
| 2b | NA | 4  |                                                        |
| NA | NA | 4  | all 5 serious AE associated with pneum vaccination     |
| NA | NA | 4  |                                                        |
| 2b | NA | 2b | Serious assessment safety.                             |
| 2b | NA | 4  |                                                        |

|    |    |    |                                                              |
|----|----|----|--------------------------------------------------------------|
| 2b | NA | 4  |                                                              |
| 4  | NA | 4  |                                                              |
|    |    |    |                                                              |
|    |    |    |                                                              |
| 2b | NA | 4  | No objective measure for assessing disease activity          |
| 2b | NA | 4  |                                                              |
| 2b | NA | 4  |                                                              |
| 2b | NA | 4  |                                                              |
| 2b | NA | NA |                                                              |
| 2b | NA | 4  | Large effect. Multivariate logistic regression influences of |
| 2b | NA | 4  |                                                              |
| 2b | NA | 4  |                                                              |
| 2b | NA | 4  |                                                              |
| 2b | NA | 2b |                                                              |
| 4  | NA | 5  |                                                              |
| 2b | NA | 2b |                                                              |
| 2b | NA | 4  |                                                              |
| NA | NA | 2b |                                                              |
| 2b | NA | 4  |                                                              |

|    |    |    |                                                                 |
|----|----|----|-----------------------------------------------------------------|
| 4  | NA | 4  |                                                                 |
| 2b | NA | 4  | Safety: only diary card                                         |
| NA | NA | 2B |                                                                 |
| 2b | NA | 4  | Influence on disease activity not assessed due to lack of tools |
| 2b | NA | 4  |                                                                 |
|    |    |    |                                                                 |

|                                    | Table IV                                                   |                                                   |                                                |
|------------------------------------|------------------------------------------------------------|---------------------------------------------------|------------------------------------------------|
| Table used for validity assessment | Are the study groups clearly defined?                      | Selection bias sufficiently prevented?            | Exposition to vaccination accurately measured? |
|                                    |                                                            |                                                   |                                                |
| Table I                            |                                                            |                                                   |                                                |
| Table I                            |                                                            |                                                   |                                                |
| Table IV                           | Not for vaccinated /non vacc patients                      | Yes; Data from RCT                                | NA                                             |
| Table I                            |                                                            |                                                   |                                                |
| Table II                           |                                                            |                                                   |                                                |
| Table II                           |                                                            |                                                   |                                                |
| Table IV                           | Yes, but no HC                                             | Yes; patients from RCT                            | Yes                                            |
| Table IV                           | Yes, but no HC                                             | Yes; patients from RCT                            | Yes                                            |
| Table IV                           | Yes, but not HC                                            | Yes, patients from RCT                            | Yes                                            |
| Table IV                           | Yes                                                        | Yes                                               | Moderately. Database and ICD codes.            |
| Table IV                           | Yes                                                        | Yes , consecutive patients                        | NA                                             |
| Table IV                           | Yes, but no HC                                             | Yes                                               | Yes                                            |
| Table IV                           | Yes                                                        | Yes                                               | Moderately. Based on claims data               |
| Table IV                           | Yes                                                        | Unknown ("a random sampling method")              | Yes                                            |
| Table IV                           | Yes                                                        | No details on recruitment                         | NA                                             |
| Table IV                           | Yes. But large share of women (Women's medical University) | Moderately. Vaccination not randomized. Selection | No: questionnaire                              |

|          |                                                                               |                                                                      |                                     |
|----------|-------------------------------------------------------------------------------|----------------------------------------------------------------------|-------------------------------------|
| Table IV | No                                                                            | Unclear: "randomly selected from <del>pharmacies</del> "             | NA                                  |
| Table IV | Yes , but no HC                                                               | No indication on how patients were recruited                         | NA                                  |
| Table IV | Yes, but no healthy control                                                   | Moderately. No details given. Only that <del>patients attended</del> | NA                                  |
| Table IV | Yes , but no HC                                                               | No indication on how patients were recruited                         | NA                                  |
| Table IV | Yes                                                                           | Moderately, consecutive                                              | NA                                  |
| Table IV | Yes                                                                           | No indication on how patients were recruited                         | NA                                  |
| Table IV | Yes, small groups                                                             | Not clear                                                            | NA                                  |
| Table IV | Partially, no indications of drugs except TNF                                 | No indication on how patients were recruited                         | NA                                  |
| Table I  |                                                                               |                                                                      |                                     |
| Table I  |                                                                               |                                                                      |                                     |
| Table I  |                                                                               |                                                                      |                                     |
| Table IV | Yes                                                                           | Yes                                                                  | Moderately: retrospective database  |
| Table IV | No. Inclusion unclear. Why only 27 pts with 5 <del>patients? Because of</del> | NA                                                                   | NA                                  |
| Table IV | No                                                                            | Moderately. "Randomly" selected <del>patients. However not</del>     | NA                                  |
| Table IV | Yes, but strange that besides steroids and <del>antimalarials no other</del>  | Unknown (no information on the <del>manner in which SLE</del>        | NA                                  |
| Table IV | Moderately: In text under Methods.                                            | Yes                                                                  | NA                                  |
| Table IV | Yes                                                                           | Unclear                                                              | Yes                                 |
| Table IV | Yes                                                                           | Moderately; consecutive                                              | NA                                  |
| Table IV | Yes                                                                           | Yes, random                                                          | Yes                                 |
| Table IV | Yes                                                                           | Yes                                                                  | NA (vaccination performed in study) |

|          |                                                               |                                                               |                                     |
|----------|---------------------------------------------------------------|---------------------------------------------------------------|-------------------------------------|
| Table IV | Yes                                                           | Yes                                                           | NA                                  |
| Table IV |                                                               | Moderately. No details given. Only that patients attended     | NA                                  |
|          |                                                               |                                                               |                                     |
|          |                                                               |                                                               |                                     |
| Table IV | Yes                                                           | Only patients who participated in PCV7                        | All vaccinated                      |
| Table IV | Yes but small group for abatacept                             | Unknown. No details are given on patients who did not receive | NA                                  |
| Table IV | Yes                                                           | Unknown. No details.                                          | NA                                  |
| Table IV | Yes                                                           | Patients invited, not consecutive                             | NA (vaccination performed in study) |
| Table IV | No. No HC characteristics.                                    | Unknown.                                                      | NA                                  |
| Table IV | Yes                                                           | Unknown. No details are given on patients who did not receive | NA                                  |
| Table IV | Yes (although no immunogenicity data in the different groups) | Not clear how patients were recruited                         | NA                                  |
| Table IV | Moderately (no information on medication use, type of         | Unknown                                                       | NA                                  |
| Table IV | Yes                                                           | Yes; consecutive patients.                                    | NA                                  |
| Table IV | Yes                                                           | Unknown. No details are given on patients who did not receive | NA                                  |
| Table IV | Yes but small group, no HC                                    | No details on recruitment                                     | NA                                  |
| Table IV | Yes                                                           | Patients invited, not consecutive                             | NA                                  |
| Table IV | Yes                                                           | Unknown. No details.                                          | NA                                  |
| Table IV | No. No different table for administered/controlled            | Unknown                                                       | NA                                  |
| Table IV | Yes, but no controls                                          | No details on recruitment                                     | NA                                  |

|          |                                           |                                                |                                     |
|----------|-------------------------------------------|------------------------------------------------|-------------------------------------|
| Table IV | Moderately. Limited info in supplementary | Unknown.                                       | NA                                  |
| Table IV | Moderately. No details on HC.             | Yes. All SSC patients consecutively invited to | Yes                                 |
| Table IV | No: no details on medication use/disease  | Unknown. Unclear how HC were selected from     | NA (vaccination performed in study) |
| Table IV | Yes                                       | Moderately. No data on how many patients       | NA                                  |
| Table IV | Yes                                       | Unknown. No details are given on patients      | NA                                  |
|          |                                           |                                                |                                     |



| Outcomes clearly defined and accurately analyzed?                  | Outcome assessment blinded for exposition to vaccination? | Sufficient f/u?                                                  | Prevention of selective loss of f/u?                  |
|--------------------------------------------------------------------|-----------------------------------------------------------|------------------------------------------------------------------|-------------------------------------------------------|
|                                                                    |                                                           |                                                                  |                                                       |
|                                                                    |                                                           |                                                                  |                                                       |
|                                                                    |                                                           |                                                                  |                                                       |
| Yes , but not primary endpoint                                     | NA                                                        | Not clear                                                        | Not clear                                             |
|                                                                    |                                                           |                                                                  |                                                       |
|                                                                    |                                                           |                                                                  |                                                       |
|                                                                    |                                                           |                                                                  |                                                       |
| Moderately: no data on specific Ab                                 | NA                                                        | Yes                                                              | Yes                                                   |
| Moderately: no data on specific Ab                                 | NA                                                        | Yes                                                              | Yes                                                   |
| Yes                                                                | NA                                                        | Yes for immunogen. No for safety                                 | Yes                                                   |
| Yes.                                                               | Unknown                                                   | Yes                                                              | NR                                                    |
| Yes                                                                | NA                                                        | Yes for immunogen.                                               | No mentioning of % loss                               |
| Yes                                                                | Na                                                        | Yes                                                              | Yes                                                   |
| No. Only indirect effect of vaccination was observed.              | NA                                                        | Yes                                                              | NA                                                    |
| Moderately: simple statistics (only binary testing between groups) | NA                                                        | Yes                                                              | Unknown (limited follow-up time)                      |
| Yes                                                                | NA                                                        | Yes                                                              | No loss reported                                      |
| No: questionnaire that included question whether patients had      | No                                                        | Yes (6 months), but timing of questionnaire not completely clear | Yes; More than 98% of patients returned questionnaire |

|                                                              |         |                                                           |                                                                   |
|--------------------------------------------------------------|---------|-----------------------------------------------------------|-------------------------------------------------------------------|
| No. Only measurement antibodies H1N1, although trivalent     | Unknown | Unknown: not earlier than 10 weeks, not further specified | No loss reported.                                                 |
| Yes                                                          | NA      | Yes                                                       | No mentioning of % loss                                           |
| Yes                                                          | NA      | Yes                                                       | No mentioning of % loss                                           |
| Yes                                                          | NA      | Yes                                                       | No mentioning of % loss                                           |
| Yes                                                          | NA      | Yes                                                       | No mentioning of % loss                                           |
| Yes                                                          | NA      | Yes                                                       | No mentioning of % loss                                           |
| Outcome used not validated                                   | NA      | Yes                                                       | Not clear                                                         |
| Yes                                                          | NA      | Yes                                                       | No mentioning of % loss                                           |
|                                                              |         |                                                           |                                                                   |
|                                                              |         |                                                           |                                                                   |
|                                                              |         |                                                           |                                                                   |
| Yes                                                          | No      | Yes                                                       | NA                                                                |
| No. Sera were considered positive when the titre was         | Yes     | Yes. No loss                                              | Unknown                                                           |
| No: based on ranks                                           | NA      | Moderately; up to 12 weeks (safety main objective)        | Yes                                                               |
| Moderately. No Seroprotection/seroconversion definition like | NA      | Yes: up to 12 weeks postvacc                              | No loss reported.                                                 |
| Moderately: only binary analysis                             | NA      | Moderately: 6 weeks                                       | Yes                                                               |
| Moderately. No details on how data was retrieved             | NA      | Unknown. Not specified.                                   | NA. Observational, retrospective analysis.                        |
| Yes                                                          | NA      | Moderately. Short term effect for disease activity        | No loss of FU                                                     |
| Yes                                                          | No      | Yes, 6 months                                             | Yes, only one control withdrew from study due to personal reasons |
| Yes                                                          | NA      | Moderately (4-6 weeks)                                    | No mentioning of % loss                                           |

|                                                               |    |                                    |                                                           |
|---------------------------------------------------------------|----|------------------------------------|-----------------------------------------------------------|
| Yes                                                           | NA | Moderately: 6 weeks                | Yes                                                       |
| No. Unclear.                                                  | NA | Yes: up to 6 months                | Unknown. Numbers unclear.                                 |
|                                                               |    |                                    |                                                           |
|                                                               |    |                                    |                                                           |
| Yes                                                           | NA | Yes                                | Yes                                                       |
| Yes                                                           | NA | Moderately (3 weeks)               | No loss of FU reported                                    |
| Yes                                                           | NA | Yes (up to 6 months)               | Yes                                                       |
| Yes                                                           | NA | Yes for immunogenicity (21 days)   | No mentioning of loss of FU                               |
| No. No p-value for comparison HC and RA                       | NA | Yes for immunogenicity (3-6 weeks) | No loss reported.                                         |
| Yes                                                           | NA | Yes for immunogenicity (3 weeks)   | Yes. 89.6% completed the study                            |
| Yes                                                           | NA | Yes for immunogenicity             | Yes                                                       |
| Yes                                                           | NA | Yes for immunogenicity (3 wks)     | No loss reported.                                         |
| Moderately. No p-values are given for the comparisons between | NA | Moderately (4-6 weeks)             | Yes. No loss reported.                                    |
| Yes                                                           | NA | Moderately (3 weeks)               | No. Only 71.8% of vaccinated controls completed the study |
| Yes                                                           | NA | Yes                                | No loss reported                                          |
| Yes                                                           | NA | 21 d (yes for immunogenicity)      | Yes (13% loss)                                            |
| Yes                                                           | NA | Yes: 3 weeks and 6 months          | No loss reported                                          |
| Yes                                                           | NA | Yes (3 months)                     | No loss reported.                                         |
| Yes                                                           | NA | Yes                                | Yes (1% lost)                                             |

|                                                            |    |                                  |                                                 |
|------------------------------------------------------------|----|----------------------------------|-------------------------------------------------|
| No, no unvaccinated disease control group                  | NA | Yes for immunogenicity           | No loss reported                                |
| Moderately. Clearly described. However only diary card for | No | Yes for immunogenicity (3 weeks) | Yes                                             |
| Yes                                                        | NA | Yes (up to 6 months)             | Moderately: 11 failed to complete the protocol. |
| Yes                                                        | NA | Yes for immunogenicity (3 weeks) | No loss reported.                               |
| Yes                                                        | NA | Yes for immunogenicity (3 weeks) | Moderately (80% of original)                    |
|                                                            |    |                                  |                                                 |

|                                                                   | Table II         |                                |                               |
|-------------------------------------------------------------------|------------------|--------------------------------|-------------------------------|
| Important confounders identified and corrected for?               | Method of random | Treatment allocation concealed | Similar group prognostic sign |
|                                                                   |                  |                                |                               |
|                                                                   |                  |                                |                               |
|                                                                   |                  |                                |                               |
| No                                                                |                  |                                |                               |
|                                                                   |                  |                                |                               |
|                                                                   | Yes              | Yes                            | Yes                           |
|                                                                   | Yes              | Yes                            | Yes                           |
| Yes                                                               |                  |                                |                               |
| Yes                                                               |                  |                                |                               |
| Yes                                                               |                  |                                |                               |
| Yes. Vaccinated patients higher % of diabetes, hypertension, COPD |                  |                                |                               |
| Yes                                                               |                  |                                |                               |
| No                                                                |                  |                                |                               |

|                                                                 |  |  |  |
|-----------------------------------------------------------------|--|--|--|
| Unknown.                                                        |  |  |  |
| Yes                                                             |  |  |  |
| Partially                                                       |  |  |  |
| Yes                                                             |  |  |  |
| No good analysis of possible confounders                        |  |  |  |
|                                                                 |  |  |  |
|                                                                 |  |  |  |
|                                                                 |  |  |  |
| Yes: adjustments were made for sex age and comorbidities. Older |  |  |  |
| Yes                                                             |  |  |  |
| No (medication use!)                                            |  |  |  |
| Yes: matched controls.                                          |  |  |  |
| Controls younger, no p value for difference is given            |  |  |  |
| NA.                                                             |  |  |  |
| Yes                                                             |  |  |  |
| Yes. HC group younger than patients.                            |  |  |  |
| Control group significantly older.                              |  |  |  |

|                                                                   |  |  |  |
|-------------------------------------------------------------------|--|--|--|
| Yes                                                               |  |  |  |
| Moderately: only large groups of treatment analysed               |  |  |  |
|                                                                   |  |  |  |
|                                                                   |  |  |  |
| Yes                                                               |  |  |  |
| Unknown. No characteristics of HC.                                |  |  |  |
| Yes: subanalysis with matched patients/controls                   |  |  |  |
| Yes                                                               |  |  |  |
| No (medication use!)                                              |  |  |  |
| Yes. Multivariable analysis was performed.                        |  |  |  |
| Yes. Gender (is explained to be unlikely to involve outcome)      |  |  |  |
| No, Patients treated with rituximab, no report of effect of other |  |  |  |
| Yes                                                               |  |  |  |
| Yes: lymphopenia                                                  |  |  |  |
| Unknown: No different table for                                   |  |  |  |
| NA                                                                |  |  |  |

|                                                          |  |  |  |
|----------------------------------------------------------|--|--|--|
| Matched controls.                                        |  |  |  |
| Yes. Controls were matched for age and gender.           |  |  |  |
| Unknown. Little information on characteristics is given. |  |  |  |
| NA                                                       |  |  |  |
| Yes                                                      |  |  |  |
|                                                          |  |  |  |



| Eligibility criteria | Outcome assessor blinded | care provided blinded | Was the patient blinded ? |
|----------------------|--------------------------|-----------------------|---------------------------|
|                      |                          |                       |                           |
|                      |                          |                       |                           |
|                      |                          |                       |                           |
|                      |                          |                       |                           |
| Yes                  | Yes                      | Yes                   | No                        |
| Yes                  | Yes                      | Yes                   | No                        |
|                      |                          |                       |                           |
|                      |                          |                       |                           |
|                      |                          |                       |                           |
|                      |                          |                       |                           |
|                      |                          |                       |                           |
|                      |                          |                       |                           |
|                      |                          |                       |                           |





|  |  |  |  |
|--|--|--|--|
|  |  |  |  |
|  |  |  |  |
|  |  |  |  |
|  |  |  |  |
|  |  |  |  |
|  |  |  |  |







|  |  |  |  |
|--|--|--|--|
|  |  |  |  |
|  |  |  |  |
|  |  |  |  |
|  |  |  |  |
|  |  |  |  |
|  |  |  |  |



| Selection of literature accurate? | Critical appraisal of included articles accurate? | Data extraction accurately described? | Important features of included trials accurately described? |
|-----------------------------------|---------------------------------------------------|---------------------------------------|-------------------------------------------------------------|
|                                   |                                                   |                                       |                                                             |
| Yes                               | Yes (online supplement, Newcastle Ottawa Scale)   | Yes                                   | Yes                                                         |
| Yes                               | Yes; Newcastle-Ottawa scale                       | Yes                                   | Yes                                                         |
|                                   |                                                   |                                       |                                                             |
| Yes                               | Yes                                               | Yes (Newcastle-Ottawa Scale)          | Yes                                                         |
|                                   |                                                   |                                       |                                                             |
|                                   |                                                   |                                       |                                                             |
|                                   |                                                   |                                       |                                                             |
|                                   |                                                   |                                       |                                                             |
|                                   |                                                   |                                       |                                                             |
|                                   |                                                   |                                       |                                                             |
|                                   |                                                   |                                       |                                                             |
|                                   |                                                   |                                       |                                                             |
|                                   |                                                   |                                       |                                                             |
|                                   |                                                   |                                       |                                                             |
|                                   |                                                   |                                       |                                                             |
|                                   |                                                   |                                       |                                                             |





|  |  |  |  |
|--|--|--|--|
|  |  |  |  |
|  |  |  |  |
|  |  |  |  |
|  |  |  |  |
|  |  |  |  |
|  |  |  |  |

| <b>Heterogeneity between studies handled accurately?/Meta-</b> | <b>Is statistical pooling correctly performed?</b> |
|----------------------------------------------------------------|----------------------------------------------------|
|                                                                |                                                    |
| Yes                                                            | Yes                                                |
| Yes                                                            | Yes                                                |
|                                                                |                                                    |
| Yes                                                            | Yes                                                |
|                                                                |                                                    |
|                                                                |                                                    |
|                                                                |                                                    |
|                                                                |                                                    |
|                                                                |                                                    |
|                                                                |                                                    |
|                                                                |                                                    |
|                                                                |                                                    |





|  |  |
|--|--|
|  |  |
|  |  |
|  |  |
|  |  |
|  |  |
|  |  |



| Name first author               | Year of publication | Country        | Years of data inclusion |
|---------------------------------|---------------------|----------------|-------------------------|
| <b>PNEUMOCOCCAL VACCINATION</b> |                     |                |                         |
| Winthrop - Study A              | 2016                | USA and Poland | 2011-12                 |
| Winthrop - Study B              | 2016                | USA and Poland | 2011-12                 |
| Kivitz                          | 2014                | USA            | 2009-11                 |
| Hesselstrand                    | 2018                | Sweden         | NR                      |
| Chatham                         | 2017                | USA            | 2012-15                 |
| Alten                           | 2016                | Multi          | NR                      |
| Migita                          | 2015                | Japan          | 2010-12                 |
| Migita                          | 2015                | Japan          | 2010-12                 |
| Migita                          | 2015                | Japan          | 2010-12                 |
| Bingham                         | 2015                | USA and UK     | 2010-12                 |
| Fischer                         | 2015                | Switzerland    | 2008-11                 |
| Tsuru                           | 2014                | Japan          | NR                      |
| Mori                            | 2013                | Japan          | 2011-12                 |

|              |      |         |           |
|--------------|------|---------|-----------|
| Rehnberg     | 2010 | Sweden  | 2007-8    |
| Grabar       | 2017 | France  | 2008-11   |
| David Morgan | 2016 | UK      | From 2009 |
| Nagel        | 2015 | Sweden  | 2008-9    |
| Kapetanovic  | 2013 | Sweden  | 2008      |
| Kapetanovic  | 2013 | Sweden  | 2008-9    |
| Kapetanovic  | 2011 | Sweden  | 2008-2009 |
| Kapetanovic  | 2011 | Sweden  | 2002-2009 |
| Nguyen       | 2017 | Denmark | 2014-17   |
| Bahuaud      | 2018 | France  | 2014-15   |
| Kapetanovic  | 2017 | Sweden  | 2012-13   |
| Nived        | 2017 | Sweden  | NR        |
| Nagel        | 2017 | Sweden  | NR        |
| Rakoczi      | 2016 | Hungary | NR        |
| Groh         | 2017 | France  | NR        |

|         |      |             |         |
|---------|------|-------------|---------|
| Jaeger  | 2017 | Switzerland | 2010-15 |
| Broyde  | 2016 | Israel      | 2012    |
| Coulson | 2011 | UK          |         |
| Izumi   | 2017 | Japan       | 2010-12 |
| Rezende | 2016 | Brazil      | 2013-14 |
|         |      |             |         |

| Type of study | Vaccine                                            | Adjuvant | Type of AIIRD     |
|---------------|----------------------------------------------------|----------|-------------------|
|               |                                                    |          |                   |
| Cohort        | PPSV23 (also influenza)                            | NR       | RA                |
| Cohort        | PPSV23                                             | NR       | RA                |
| Cohort        | PPSV23                                             | NR       | RA                |
| Cohort        | PPSV23/PCV13                                       | NR       | SSc               |
| Cohort        | PPSV23 4w before belimumab and after 24w belimumab | NR       | SLE               |
| Cohort        | PPSV23                                             | NR       | RA                |
| Cohort        | PPSV23                                             | NR       | RA                |
| Cohort        | PPSV23                                             | NR       | RA                |
| Cohort        | PPSV23                                             | NR       | RA                |
| Cohort        | PPSV23                                             | NR       | RA                |
| Cohort        | PPSV23                                             | NR       | RA,SpA, vasc, CTD |
| Cohort        | PPSV23                                             | NR       | RA                |
| Cohort        | PPSV23                                             | NR       | RA                |

|             |                                                                    |    |               |
|-------------|--------------------------------------------------------------------|----|---------------|
| Cohort      | PPSV23                                                             | NR | RA            |
| RCT         | PCV7, PPSV23                                                       | NR | SLE           |
| Cohort      | PCV7                                                               | NR | GPA, MPA, EGA |
| Cohort      | PCV7                                                               | NR | RA            |
| Cohort      | PCV7                                                               | NR | RA+SpA        |
| Cohort      | PCV7                                                               | NR | RA            |
| Cohort      | PCV7                                                               | NR | RA + SpA      |
| Cohort      | PCV7, PPSV23                                                       | NR | RA + SpA      |
| RCT         | PCV13 + PPSV23 (16w)<br>PCV13 + PPSV23 (24w)<br>PCV13+PCV13+PPSV23 | NR | RA            |
| Cohort      | PCV13+<br>PPSV23 after 8w                                          | NR | RA            |
| Cohort      | PCV13                                                              | NR | RA            |
| Cohort      | PCV13                                                              | NR | Vasculitis    |
| Cohort      | PCV13                                                              | NR | SLE           |
| Cohort      | PCV13                                                              | NR | RA            |
| Case series | PCV13/PCV7 ± PPSV23                                                | NR | AAV           |

|                      |                  |    |         |
|----------------------|------------------|----|---------|
| Cohort               | PCV13 and PPSV23 | NR | CAPS    |
| Cohort retrospective | PPSV23           | NR | RA, SpA |
| Cohort retrospective | PPSV23           | NR | RA      |
| RCT                  | PPSV23           | NR | RA      |
| Cohort               | PPSV23           | NR | SLE     |
|                      |                  |    |         |

| Number of participants                         | Age in years: mean (SD) or median ([interquartile] range) | % Women         | Disease duration in years: mean (SD) or median ([interquartile]) |
|------------------------------------------------|-----------------------------------------------------------|-----------------|------------------------------------------------------------------|
| Tofacitinib 102<br>Placebo 98                  | 53 (25–82)<br>53 (23–77)                                  | 73.5<br>80.6    | NR                                                               |
| Cont Tofa 92<br>Stop Tofa 91                   | 57.0 (28–78)<br>54.0 (24–72)                              | 84.8<br>86.8    |                                                                  |
| CTZ 110 (68%+MTX)<br>Placebo 114 (68%<br>+MTX) | 53.1 (11.8)<br>7.4 (8.1)                                  | 83.6<br>76.3    | 7.4 (8.1)<br>7.9 (8.4)                                           |
| 13PCV13 / 31PPSV23<br>49 HC                    | SSc without DMARD:<br>57.0 (12.5)<br>SSc on DMARD: 55.5   | 94<br>100<br>63 | 11.4 (7.4)<br>6.2 (6.3)                                          |
| 4 weeks bef B: 34<br>24 w after B: 45          | 41.0 (12.57)<br>38.6 (12.31)                              | 85.3<br>95.6    | 7.9 (8.71)<br>7.7 (7.36)                                         |
| ABA + MTX 125                                  | 45.7 (13.8)                                               | 85.6            |                                                                  |
| DMARDs 35<br>MTX 55<br>ABA+MTX 21              | 70.5 (10.8)<br>63.8 (11.5)<br>59.8 (12)                   | 65<br>80<br>80  | 11.6 (12.5)<br>14.1 (10.9)<br>13.5 (11.2)                        |
| DMARDs 35<br>MTX 55<br>TAC 29                  | 70.5 (10.8)<br>63.8 (11.5)<br>69.2 (9.87)                 | 65<br>80<br>68  | 11.6 (12.5)<br>14.1 (10.9)<br>10.5 (9.7)                         |
| DMARDs 35<br>MTX 55<br>GOL+MTX 24              | 70.5 (10.8)<br>63.8 (11.5)<br>62.6 (11.9)                 | 65<br>80<br>91  | 11.6 (12.5)<br>14.1 (10.9)<br>15.8 (12.3)                        |
| MTX 27<br>TCZ+MTX 54                           | 51.4 (9.5)<br>51.1 (8.9)                                  | 81.5<br>75.9    | 8.4 (7.0)<br>13.2 (11.5)                                         |
| 57 vacc<br>122 non vac                         | 53.9 (43.3–65.7)                                          | 58              | NR                                                               |
| TCZ 21                                         | 54 (28-67)                                                | 80              | 9 (3-23)                                                         |
| MTX 62<br>MTX+TCZ 54<br>TCZ 50                 | 68.3 (66.6-70.1)<br>65.1 (63.1- 67.0)<br>68.3 (65.8-70.8) | 82<br>92<br>86  | 10.0 (7.8-12.1)<br>9.1 (7.3-10.8)<br>12.5 (9.6-15.3)             |

|                          |                        |      |                       |
|--------------------------|------------------------|------|-----------------------|
| RTX 36w 11               | 60 (7.8)               | 90   | 17.3 (13.1)           |
| Pre-RTX 1w 8             | 65.4 (11.5)            | 87   | 8.6 (5.5)             |
| RA disease controls (low | 63.6 (12.9)            | 70   | 7.4 (4.6)             |
| 27 Placebo-PPSV23        | 41.4 (36.4–50.7)       | 82   | 7.6 (3.1–18.6)        |
| 19 PCV7-PPSV23           | 35.7 (31.3–48.2)       | 92   | 7.2 (4.5–14.2)        |
| 92                       | 48                     | 48   | 5.6 (2.7–8.7)         |
| 248 RA                   | 60.8 (12.4)            | 81   | NR                    |
| 249 SpA                  | 50.6 (11.6)            | 45   |                       |
| RTX 29                   | 68.9 (9)               | 72   | 21.3 (14)             |
| RTX+MTX 26               | 59.9 (12)              | 62   | 14.5 (12)             |
| ABA 17                   | 56.6 (13)              | 88   | 14.9 (2.9)            |
| RA MTX 57                | 63.5 (11)              | 77   |                       |
| RA anti-TNF 50           | 59.9 (14)              | 90   |                       |
| RA anti-TNF+MTX 56       | 60.5 (9)               | 75   |                       |
| RA MTX 85                | 61.4 (14) sign. diff.  | 79   | 11.4 (10)             |
| RA MTX + anti-TNF 89     | 60.1 (10)              | 77   | 16.2 (12) sign. diff. |
| RA anti-TNF 79           | 59.8 (14)              | 87   | 20.6 (11) sign. diff. |
| RA MTX PCV7 85           | 61.4 (24–85)           | 79   | 11.4 (0–40)           |
| RA MTX PPSV23 37         | 61.3 (21–81)           | 68   | 7 (1–47)              |
| RA anti-TNF PCV7 79      | 59.8 (24–86)           | 87   | 20.6 (1–48)           |
| in analysis:             | bDMARD: 62 (32–82)     | 65   | 12 (0.5–33)           |
| csDMARDs (not            | csDMARDs: 59 (23–82)   | 64   | 7 (0–54)              |
| randomised) 35           |                        |      |                       |
| 23 RA (MTX + anti-TNF)   | 62.5 (32–71)           | 72   | NA                    |
| MTX 10                   | 67.4 (39.1–78.6)       | 70   | 8 (1–39)              |
| No treatment 10          |                        |      |                       |
| 49 Vasculitis            | 65 (22–85)             | 51   | 5.1 (0–42)            |
| 49 HC                    | 57 (17–85)             | 63   |                       |
| 21 HC                    | 43.6 (20.6–61.2)       | 85.7 | x                     |
| 7 no DMARD               | 63.3 (26.0–80.1)       | 100  | 20.1 (0–37)           |
| 9 AZA or DMARD other     | 58.3 (35.0–73.3)       | 100  | 21.9 (4–50)           |
| 22 RA                    | 55.1 (10.4)            | 77   | 12.7 (12)             |
| 24 OA                    | 63.9 (9.8) sign. diff. | 75   | 0.7 (0–1.7)           |
| 9 Induction: 9 GC + CYC  | 55 (17)                | 55   |                       |
| or RTX                   |                        |      |                       |
| 10 maintenance: GC       |                        |      |                       |



|                                |                                        |                         |                                      |
|--------------------------------|----------------------------------------|-------------------------|--------------------------------------|
| 2 PCV13<br>14 PPSV23           | 31 (30)<br>41 (17)                     | 100<br>71               | 30 (31)<br>36 (21)                   |
| Vacc 88<br>Non Vacc 42         | All 54.6 (20–88)                       | 80                      |                                      |
| Vac 124<br>Non vacc 28         | 63<br>62                               | 72<br>70                | 13 (all)                             |
| RA 464<br>RA Placebo 436       | 63.3 (12.1)<br>62.7 (11.8)             | 80.6<br>75.7            | 12.1 (10.4)<br>11.6 (9.7)            |
| SLE 68 :<br>IS 28<br>non IS 26 | IS: 35.5 (9.4)<br>Non IS : 43.3 (11.7) | IS: 92.8<br>non IS:88.4 | IS: 9.1 (7.2)<br>non IS :(12.1 (6.2) |
|                                |                                        |                         |                                      |

| <b>Follow-up</b> | <b>Medication</b>                  | <b>Outcome (efficacy, immunogenicity, safety)</b> | <b>Type of study Oxford Centre - Immunogenicity</b> |
|------------------|------------------------------------|---------------------------------------------------|-----------------------------------------------------|
|                  |                                    |                                                   |                                                     |
| 35d              | Tofacitinib, MTX                   | Immunogenicity                                    | 2b                                                  |
| 35d              |                                    | Immunogenicity                                    | 2b                                                  |
| 4-6w             | CTZ                                | Immunogenicity, safety                            | 1b-2b                                               |
| 4w               | DMARDs                             | Immunogenicity                                    | 2b                                                  |
| 4w               | Belimumab                          | Immunogenicity, safety                            | 2b                                                  |
| 4-6w             | ABT + MTX<br>(Only 10 without MTX) | Immunogenicity, safety                            | 2b                                                  |
| 4-6w             | Abatacept                          | Immunogenicity, safety                            | 2b                                                  |
| 4-6w             | Tacrolimus, MTX                    | Immunogenicity, safety                            | 2b                                                  |
| 4-6w             | Golimumab, MTX                     | Immunogenicity, safety                            | 2b                                                  |
| 8w               | TCZ, MTX                           | Immunogenicity, safety                            | 2b                                                  |
| 4-6w             | CS, IS, RTX                        | Immunogenicity and efficacy                       | 4                                                   |
| 4-6w             | TCZ                                | Immunogenicity                                    | 2b                                                  |
| 4-6w             | TCZ, MTX                           | Immunogenicity, safety                            | 2b                                                  |

|                    |                                      |                             |    |
|--------------------|--------------------------------------|-----------------------------|----|
| 4w                 | Rituximab                            | Immunogenicity              | 4  |
| 28w                | HCO, GC, IS                          | Immunogenicity, safety      | 1b |
| 4w, 2y             | Past CYC and RTX, AZA, MMF, Loe pred | Immunogenicity and efficacy | 2b |
| 4.5y               | MTX, TNF                             | Immunogenicity, efficacy    | 2b |
| 4w                 | RTX, TCZ, ABA                        | Immunogenicity, safety      | 2b |
| 1.5y               | MTX, anti-TNF                        | Immunogenicity              | 2b |
| 4w                 | MTX, anti-TNF                        | Immunogenicity, safety      | 2b |
| 4w                 | MTX, anti-TNF                        | Immunogenicity, safety      | 2b |
| 4w after each vacc | bDMARDs<br>csDMARDs                  | Immunogenicity, safety      | 2b |
| 4m, 12m and 24m    | MTX                                  | Immunogenicity              | 2b |
| 4 w                | MTX                                  | Immunogenicity              | 4  |
| 4-6w               | AZA,MTX,CyC, MMF,GC                  | Immunogenicity, safety      | 2b |
| 4-6w               | IS, HCO, Belimumab                   | Immunogenicity, safety      | 2b |
| 4-8w               | Etanercept 7<br>Etanercept + MTX 15  | Immunogenicity, safety      | 2b |
| 9-45m              | CYC, RTX, AZA, GC                    | Immunogenicity              | 4  |

|              |                                   |                              |    |
|--------------|-----------------------------------|------------------------------|----|
|              | Canakinumab                       | Safety                       | NA |
| 14 (0-55)    | TNF, MTX                          | Immunogenicity               | 2b |
| 10y          | MTX, CS                           | Immunogenicity,<br>efficacy  | 2b |
| 1.7y<br>1.6y | TNF, IL6, MTX, ABA,<br>TAC, CS    | Efficacy and safety          | NA |
| 4-6 w        | Prednisone, HCQ, MMF,<br>CYC, AZA | Immunogenicity and<br>safety | 2b |
|              |                                   |                              |    |

| Type of study Oxford Centre - Efficacy | Type of study Oxford Centre - Safety | Other comments   | Table used for validity assessment |
|----------------------------------------|--------------------------------------|------------------|------------------------------------|
|                                        |                                      |                  |                                    |
| NA                                     | NA                                   |                  | Table IV                           |
| NA                                     | NA                                   |                  | Table IV                           |
| NA                                     | NA                                   |                  | Table IV                           |
| NA                                     | 4                                    |                  | Table IV                           |
| NA                                     | 4                                    | Sponsored by GSK | Table IV                           |
| NA                                     | 4                                    |                  | Table IV                           |
| NA                                     | 4                                    |                  | Table IV                           |
| NA                                     | 4                                    |                  | Table IV                           |
| NA                                     | 4                                    |                  | Table IV                           |
| NA                                     | 4                                    |                  | Table IV                           |
| 4                                      | NA                                   |                  | Table IV                           |
| NA                                     | NA                                   |                  | Table IV                           |
| NA                                     | 4                                    |                  | Table IV                           |

|    |    |                                                     |          |
|----|----|-----------------------------------------------------|----------|
| NA | NA |                                                     | Table IV |
| NA | 4  | Underpowered for safety                             | Table II |
| 4  | NA |                                                     | Table IV |
| 4  | NA |                                                     | Table IV |
| NA | 4  |                                                     | Table IV |
| NA | NA |                                                     | Table IV |
| NA | 4  | Table IV+U63:AB63                                   | Table IV |
| NA | 4  | Comparison between data on paper on PCV7 and PPSV23 | Table IV |
| NA | 4  |                                                     | Table II |
| NA | NA |                                                     | Table IV |
| NA | NA |                                                     | Table IV |
| NA | 4  |                                                     | Table IV |
| NA | 4  |                                                     | Table IV |
| NA | 4  |                                                     | Table IV |
| NA | 4  |                                                     | Table IV |
| NA | NA |                                                     | Table IV |

|      |    |              |          |
|------|----|--------------|----------|
| NA   | 4  |              | Table IV |
| NA   | NA |              | Table IV |
| 4    | NA |              | Table IV |
| 1-2b | 4  | Underpowered | Table II |
| NA   | 4  |              | Table IV |
|      |    |              |          |

| Table IV                              |                                                      |                                                |                                                    |
|---------------------------------------|------------------------------------------------------|------------------------------------------------|----------------------------------------------------|
| Are the study groups clearly defined? | Selection bias sufficiently prevented?               | Exposition to vaccination accurately measured? | Outcomes clearly defined and accurately analyzed?  |
| Yes but no HC                         | Yes; patients from RCT                               | Yes                                            | Moderately: no data on specific Ab                 |
| Yes but no HC                         | Yes, patients from RCT                               | Yes                                            | Moderately : no data on specific Ab                |
| Yes, but not HC                       | Yes, patients from RCT                               | Yes                                            | Yes                                                |
| Yes                                   | Yes                                                  | Yes (only non-vaccinated)                      | Yes                                                |
| Yes but no HC                         | Not clear                                            | Yes                                            | Yes but primary outcome: response in 1 out of 23 ! |
| Yes, but no HC                        | Yes, patients on CT                                  | Yes                                            | Yes                                                |
| Yes                                   | May be, no indication on how patients were recruited | NA                                             | Yes                                                |
| Yes                                   | May be, no indication on how patients were recruited | NA                                             | Yes                                                |
| Yes                                   | May be, no indication on how patients were recruited | NA                                             | Yes                                                |
| Yes, but no HC                        | Patients from RCT                                    | NA                                             | Yes                                                |
| Yes, but very heterogenous            | Not clear                                            | NA                                             | Too many outcomes , no clear primary outcome       |
| Yes, but no HC                        | May be, no indication on how patients were recruited | NA                                             | Yes                                                |
| No , but no HC                        | No                                                   | NA                                             | Yes                                                |



|                                |                                                      |                               |                                                                 |
|--------------------------------|------------------------------------------------------|-------------------------------|-----------------------------------------------------------------|
| Yes, small groups              | Not clear                                            | NA                            | Outcome used not validated                                      |
|                                |                                                      |                               |                                                                 |
| Yes, no HC                     | Only patients in remission                           | NA                            | Yes                                                             |
| Yes                            | No indication on how patients were recruited         | No data on PPSV23 in Controls | Moderately; Definition only based on ICD 9                      |
| Yes                            | May be, no indication on how patients were recruited | NA                            | Yes                                                             |
| Yes                            | May be, no indication on how patients were recruited | NA                            | Yes                                                             |
| Yes                            | May be, no indication on how patients were recruited | NA                            | Yes                                                             |
| Yes                            | May be, no indication on how patients were recruited | NA                            | Yes                                                             |
|                                |                                                      |                               |                                                                 |
| Yes, but no HC                 | May be, no indication on how patients were recruited | NA                            | Yes                                                             |
| Yes, but small groups          | Yes                                                  | NA                            | Yes, but mostly focused on mechanism of MTX on vaccine response |
| Yes                            | No                                                   | NA                            | Yes                                                             |
| Yes, but small sub-groups      | May be, no indication on how patients were recruited | NA                            | Yes                                                             |
| Yes                            | May be, no indication on how patients were recruited | NA                            | Yes, but outcome not validated                                  |
| Yes, but small group and no HC | May be, no indication on how patients were recruited | NA                            | Yes                                                             |

|                 |                          |     |                                                   |
|-----------------|--------------------------|-----|---------------------------------------------------|
| Yes             | No. Observational study. | Yes | Moderately. No details on how data was retrieved. |
| Yes             | No , consecutive pts     | NA  | Yes , but outcome of immunogen not validated      |
| Yes             | Not clear                | Yes | Outcome used not validated                        |
|                 |                          |     |                                                   |
| Yes , but no HC | No                       | Yes | Yes                                               |
|                 |                          |     |                                                   |

| Outcome assessment blinded for exposition to vaccination? | Sufficient f/u?        | Prevention of selective loss of f/u? | Important confounders identified and corrected for? |
|-----------------------------------------------------------|------------------------|--------------------------------------|-----------------------------------------------------|
| NA                                                        | Yes                    | Yes                                  | Yes                                                 |
| NA                                                        | Yes                    | Yes                                  | Yes                                                 |
| NA                                                        | Yes for immunogen.     | Yes                                  | Yes                                                 |
| NA                                                        | Yes for Immunogenicity | No loss                              | Yes                                                 |
| NA                                                        | Yes                    | Yes                                  | Yes                                                 |
| Yes                                                       | Yes                    | Yes                                  | Yes                                                 |
| NA                                                        | Yes for immunogen.     | No mentioning of % loss              | Yes                                                 |
| NA                                                        | Yes for immunogen.     | No mentioning of % loss              | Yes                                                 |
| NA                                                        | Yes for immunogen.     | No mentioning of % loss              | Yes                                                 |
| NA                                                        | Yes                    | Yes                                  | Only for age and treatment with TCZ                 |
| NA                                                        | Yes                    | Yes                                  | Yes                                                 |
| NA                                                        | Yes                    | No mentioning of % loss              | Yes                                                 |
| NA                                                        | Yes for immunogen.     | No mentioning of % loss              | Yes                                                 |

|    |     |                         |                                  |
|----|-----|-------------------------|----------------------------------|
| NA | Yes | Not clear               | Yes                              |
|    |     |                         |                                  |
| NA | Yes | No mentioning of % loss | Yes                              |
| NA | Yes | Yes                     | No matching for co - morbidities |
| NA | Yes | Yes                     | Yes                              |
| NA | Yes | Yes                     | Yes                              |
| NA | Yes | Yes                     | Yes                              |
| NA | Yes | Yes                     | Yes                              |
|    |     |                         |                                  |
| NA | Yes | No mentioning of % loss | Yes                              |
| NA | Yes | No loss reported.       | Yes                              |
| NA | Yes | No mentioning of % loss | Yes                              |
| NA | Yes | No mentioning of % loss | Yes                              |
| NA | Yes | No mentioning of % loss | Yes                              |
| NA | Yes | No mentioning of % loss | Yes                              |

|                         |                         |                                            |     |
|-------------------------|-------------------------|--------------------------------------------|-----|
| NA (all pts vaccinated) | Unknown. Not specified. | NA. Observational, retrospective analysis. | NA. |
| NA                      | Yes                     | Yes                                        | Yes |
| NA                      | Yes                     | Yes                                        | Yes |
|                         |                         |                                            |     |
| NA                      | Yes for Immunogenicity  | Yes                                        | Yes |
|                         |                         |                                            |     |



|     |     |     |     |
|-----|-----|-----|-----|
|     |     |     |     |
| Yes | Yes | Yes | Yes |
|     |     |     |     |
|     |     |     |     |
|     |     |     |     |
|     |     |     |     |
|     |     |     |     |
|     |     |     |     |
| Yes | No  | Yes | Yes |
|     |     |     |     |
|     |     |     |     |
|     |     |     |     |
|     |     |     |     |
|     |     |     |     |
|     |     |     |     |
|     |     |     |     |

|     |     |     |     |
|-----|-----|-----|-----|
|     |     |     |     |
|     |     |     |     |
|     |     |     |     |
| Yes | Yes | Yes | Yes |
|     |     |     |     |
|     |     |     |     |



| Outcome assessor blinded | care provided blinded | Was the patient blinded ? | Was follow up completed |
|--------------------------|-----------------------|---------------------------|-------------------------|
|                          |                       |                           |                         |
|                          |                       |                           |                         |
|                          |                       |                           |                         |
|                          |                       |                           |                         |
|                          |                       |                           |                         |
|                          |                       |                           |                         |
|                          |                       |                           |                         |
|                          |                       |                           |                         |
|                          |                       |                           |                         |
|                          |                       |                           |                         |
|                          |                       |                           |                         |
|                          |                       |                           |                         |
|                          |                       |                           |                         |
|                          |                       |                           |                         |

|     |     |     |     |
|-----|-----|-----|-----|
|     |     |     |     |
| Yes | Yes | Yes | Yes |
|     |     |     |     |
|     |     |     |     |
|     |     |     |     |
|     |     |     |     |
|     |     |     |     |
|     |     |     |     |
| No  | No  | No  | Yes |
|     |     |     |     |
|     |     |     |     |
|     |     |     |     |
|     |     |     |     |
|     |     |     |     |
|     |     |     |     |
|     |     |     |     |

|     |     |     |     |
|-----|-----|-----|-----|
|     |     |     |     |
|     |     |     |     |
|     |     |     |     |
| Yes | Yes | Yes | Yes |
|     |     |     |     |
|     |     |     |     |



|     |    |  |  |
|-----|----|--|--|
|     |    |  |  |
| Yes | No |  |  |
|     |    |  |  |
|     |    |  |  |
|     |    |  |  |
|     |    |  |  |
|     |    |  |  |
|     |    |  |  |
| Yes | No |  |  |
|     |    |  |  |
|     |    |  |  |
|     |    |  |  |
|     |    |  |  |
|     |    |  |  |
|     |    |  |  |
|     |    |  |  |

|     |     |  |  |
|-----|-----|--|--|
|     |     |  |  |
|     |     |  |  |
|     |     |  |  |
| Yes | Yes |  |  |
|     |     |  |  |
|     |     |  |  |







|  |  |  |  |
|--|--|--|--|
|  |  |  |  |
|  |  |  |  |
|  |  |  |  |
|  |  |  |  |
|  |  |  |  |
|  |  |  |  |
|  |  |  |  |





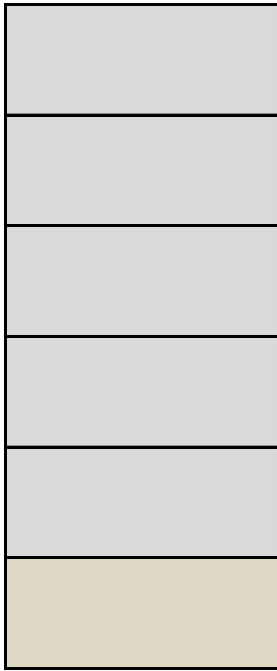

| Name first author                  | Year of publication | Country         |
|------------------------------------|---------------------|-----------------|
| <b>HEPATITIS A<br/>VACCINATION</b> |                     |                 |
| Rosdahl                            | 2018                | Sweden          |
| Askling                            | 2013                | Sweden          |
| van der Bijlaardt                  | 2013                | The Netherlands |
|                                    |                     |                 |

| <b>Years of data inclusion</b> | <b>Type of study</b>   | <b>Vaccine</b>                                                                                 |
|--------------------------------|------------------------|------------------------------------------------------------------------------------------------|
|                                |                        |                                                                                                |
| NR                             | Cohort                 | Hep A, vaccine at month 0,1,6 or two at month 0 and 1 at month 6. HC: vaccine at month 0 and 6 |
| NR                             | Cohort                 | HAV: Havrix and epaxal                                                                         |
| 2005-12                        | Cohort (retrospective) | HAV                                                                                            |
|                                |                        |                                                                                                |

| Adjuvant                              | Type of AIIRD                          | Number of participants                           |
|---------------------------------------|----------------------------------------|--------------------------------------------------|
|                                       |                                        |                                                  |
| Havrix: aluminium, Expaxal: virosomes | RA                                     | RA 69<br>HC 48                                   |
| NR                                    | RA                                     | RA 52                                            |
| NR                                    | Not specifically AIIRD, but IS-treated | All 173<br>Anti-TNF 31<br>DMARDs 123<br>Other 19 |
|                                       |                                        |                                                  |

| Age in years: mean (SD) or median ([interquartile] range) | % Women             | Disease duration in years: mean (SD) or median ([interquartile] range) |
|-----------------------------------------------------------|---------------------|------------------------------------------------------------------------|
|                                                           |                     |                                                                        |
| 55 (40-70)<br>60 (19-73)                                  | 85<br>55            | 12 (1-43)                                                              |
| 60 (32-75)                                                | 73                  | 12 (2-45)                                                              |
| x<br>50 (22-76)<br>49 (19-78)<br>51 (20-61)               | x<br>61<br>63<br>58 | NR                                                                     |
|                                                           |                     |                                                                        |



| <b>Follow-up</b> | <b>Medication</b>           | <b>Outcome (efficacy, immunogenicity, safety)</b> |
|------------------|-----------------------------|---------------------------------------------------|
|                  |                             |                                                   |
| 12m              | TNFi and/or MTX, 1 anti-IL6 | Immunogenicity, safety                            |
| 1, 12, 24m       |                             | Immunogenicity, safety                            |
| At least 4 weeks | TNF, DMARDs, other IS       | Immunogenicity                                    |
|                  |                             |                                                   |

| Type of study Oxford Centre<br>- Immunogenicity | Type of study Oxford Centre<br>- Efficacy | Type of study Oxford Centre<br>- Safety |
|-------------------------------------------------|-------------------------------------------|-----------------------------------------|
|                                                 |                                           |                                         |
| 2b                                              | NA                                        | 4                                       |
| 2b                                              | na                                        | 4                                       |
| 2b                                              | NA                                        | NA                                      |
|                                                 |                                           |                                         |

|                |                                    | Table IV                                        |
|----------------|------------------------------------|-------------------------------------------------|
| Other comments | Table used for validity assessment | Are the study groups clearly defined?           |
|                |                                    |                                                 |
|                | Table IV                           | Yes                                             |
|                | Table IV                           | Yes, but no HC                                  |
|                | Table IV                           | No, no details on diseases, only based on drugs |
|                |                                    |                                                 |

| <b>Selection bias sufficiently prevented?</b> | <b>Exposition to vaccination accurately measured?</b> | <b>Outcomes clearly defined and accurately analyzed?</b>                                     |
|-----------------------------------------------|-------------------------------------------------------|----------------------------------------------------------------------------------------------|
|                                               |                                                       |                                                                                              |
| Yes                                           | Yes                                                   | Yes, some problems with measuring anti-HAV but this was adequately identified and dealt with |
| Not clear how patients were recruited         | No                                                    | Yes                                                                                          |
| Not clear                                     | NA                                                    | Yes                                                                                          |
|                                               |                                                       |                                                                                              |

| Outcome assessment blinded for exposition to vaccination? | Sufficient f/u? | Prevention of selective loss of f/u? |
|-----------------------------------------------------------|-----------------|--------------------------------------|
|                                                           |                 |                                      |
| NA (all vaccinated)                                       | Yes             | Yes                                  |
| NA                                                        | Yes             | Yes                                  |
| NA                                                        | Yes             | NA: retrospective                    |
|                                                           |                 |                                      |

|                                                                                                              | Table II         |                                |
|--------------------------------------------------------------------------------------------------------------|------------------|--------------------------------|
| Important confounders identified and corrected for?                                                          | Method of random | Treatment allocation concealed |
|                                                                                                              |                  |                                |
| Identified yes, but not all were possible to correct. Those are mentioned (age, %females). Different vaccine |                  |                                |
| Yes                                                                                                          |                  |                                |
| Yes                                                                                                          |                  |                                |
|                                                                                                              |                  |                                |

| <b>Similar group prognostic sign</b> | <b>Eligibility criteria</b> | <b>Outcome assessor blinded</b> |
|--------------------------------------|-----------------------------|---------------------------------|
|                                      |                             |                                 |
|                                      |                             |                                 |
|                                      |                             |                                 |
|                                      |                             |                                 |
|                                      |                             |                                 |
|                                      |                             |                                 |

| care provided blinded | Was the patient blinded ? | Was follow up completed |
|-----------------------|---------------------------|-------------------------|
|                       |                           |                         |
|                       |                           |                         |
|                       |                           |                         |
|                       |                           |                         |
|                       |                           |                         |



|                                                                                     |                                        | Table I                            |
|-------------------------------------------------------------------------------------|----------------------------------------|------------------------------------|
| <b>Were the points estimates and variability presented for the primary outcome?</b> | <b>Did the analysis include an ITT</b> | <b>Literature search accurate?</b> |
|                                                                                     |                                        |                                    |
|                                                                                     |                                        |                                    |
|                                                                                     |                                        |                                    |
|                                                                                     |                                        |                                    |
|                                                                                     |                                        |                                    |
|                                                                                     |                                        |                                    |

| Selection of literature accurate? | Critical appraisal of included articles accurate? | Data extraction accurately described? |
|-----------------------------------|---------------------------------------------------|---------------------------------------|
|                                   |                                                   |                                       |
|                                   |                                                   |                                       |
|                                   |                                                   |                                       |
|                                   |                                                   |                                       |
|                                   |                                                   |                                       |

| Important features of included trials accurately described? | Heterogeneity between studies handled accurately?/Meta-analysis | Is statistical pooling correctly performed? |
|-------------------------------------------------------------|-----------------------------------------------------------------|---------------------------------------------|
|                                                             |                                                                 |                                             |
|                                                             |                                                                 |                                             |
|                                                             |                                                                 |                                             |
|                                                             |                                                                 |                                             |
|                                                             |                                                                 |                                             |

| Name first author                  | Year of publication | Country  | Years of data inclusion |
|------------------------------------|---------------------|----------|-------------------------|
| <b>HEPATITIS B<br/>VACCINATION</b> |                     |          |                         |
| Intongkam                          | 2018                | Thailand | 2013-16                 |
|                                    |                     |          |                         |

| Type of study | Vaccine              | Adjuvant | Type of AIIRD |
|---------------|----------------------|----------|---------------|
|               |                      |          |               |
| Cohort        | Hepatitis B Eu Vax B | NR       | RA            |
|               |                      |          |               |

| Number of participants                                    | Age in years: mean (SD) or median ([interquartile] range) | % Women    | Disease duration in years: mean (SD) or median ([interquartile] range) |
|-----------------------------------------------------------|-----------------------------------------------------------|------------|------------------------------------------------------------------------|
|                                                           |                                                           |            |                                                                        |
| RA 46<br>HC 9<br>RA non-vacc. 47 disease control (safety) | 60.1 (10.2)<br>60.6 (8.1)                                 | 100<br>100 | NR                                                                     |
|                                                           |                                                           |            |                                                                        |

| <b>Follow-up</b> | <b>Medication</b> | <b>Outcome (efficacy, immunogenicity, safety)</b> | <b>Type of study Oxford Centre - Immunogenicity</b> |
|------------------|-------------------|---------------------------------------------------|-----------------------------------------------------|
|                  |                   |                                                   |                                                     |
| 32w              | cDMARDs, bDMARDs  | Immunogenicity, safety                            | 2b                                                  |
|                  |                   |                                                   |                                                     |

| Type of study Oxford Centre - Efficacy | Type of study Oxford Centre - Safety | Other comments | Table used for validity assessment |
|----------------------------------------|--------------------------------------|----------------|------------------------------------|
|                                        |                                      |                |                                    |
| NA                                     | 4                                    |                | Table IV                           |
|                                        |                                      |                |                                    |



| Table IV                              |                                        |                                                |                                                   |
|---------------------------------------|----------------------------------------|------------------------------------------------|---------------------------------------------------|
| Are the study groups clearly defined? | Selection bias sufficiently prevented? | Exposition to vaccination accurately measured? | Outcomes clearly defined and accurately analyzed? |
|                                       |                                        |                                                |                                                   |
| Yes, small number HC                  | Yes                                    | Yes                                            | Yes                                               |
|                                       |                                        |                                                |                                                   |

| <b>Outcome assessment blinded for exposition to vaccination?</b> | <b>Sufficient f/u?</b> | <b>Prevention of selective loss of f/u?</b> | <b>Important confounders identified and corrected for?</b> |
|------------------------------------------------------------------|------------------------|---------------------------------------------|------------------------------------------------------------|
|                                                                  |                        |                                             |                                                            |
| Not clear how non vaccination of RA control group was assessed   | Yes                    | Yes                                         | Yes                                                        |
|                                                                  |                        |                                             |                                                            |

| Table II         |                                |                               |                      |
|------------------|--------------------------------|-------------------------------|----------------------|
| Method of random | Treatment allocation concealed | Similar group prognostic sign | Eligibility criteria |
|                  |                                |                               |                      |
|                  |                                |                               |                      |
|                  |                                |                               |                      |
|                  |                                |                               |                      |

| <b>Outcome assessor blinded</b> | <b>care provided blinded</b> | <b>Was the patient blinded ?</b> | <b>Was follow up completed</b> |
|---------------------------------|------------------------------|----------------------------------|--------------------------------|
|                                 |                              |                                  |                                |
|                                 |                              |                                  |                                |
|                                 |                              |                                  |                                |

|                                                                     |                                 | Table I                     |                                   |
|---------------------------------------------------------------------|---------------------------------|-----------------------------|-----------------------------------|
| Were the points estimates and variability presented for the primary | Did the analysis include an ITT | Literature search accurate? | Selection of literature accurate? |
|                                                                     |                                 |                             |                                   |
|                                                                     |                                 |                             |                                   |
|                                                                     |                                 |                             |                                   |

| <b>Critical appraisal of included articles accurate?</b> | <b>Data extraction accurately described?</b> | <b>Important features of included trials accurately described?</b> | <b>Heterogeneity between studies handled accurately?/Meta-analysis adequately</b> |
|----------------------------------------------------------|----------------------------------------------|--------------------------------------------------------------------|-----------------------------------------------------------------------------------|
|                                                          |                                              |                                                                    |                                                                                   |
|                                                          |                                              |                                                                    |                                                                                   |
|                                                          |                                              |                                                                    |                                                                                   |

|                                                    |
|----------------------------------------------------|
|                                                    |
| <b>Is statistical pooling correctly performed?</b> |
|                                                    |
|                                                    |
|                                                    |

| Name first author                     | Year of publication | Country     | Years of data inclusion |
|---------------------------------------|---------------------|-------------|-------------------------|
| <b>TETANUS TOXOID<br/>VACCINATION</b> |                     |             |                         |
| Jaeger                                | 2017                | Switzerland | 2010-2015               |
| Bingham                               | 2015                | USA and UK  | 2010-12                 |
|                                       |                     |             |                         |



| Type of study | Vaccine                                                    | Adjuvant | Type of AIIRD                                        |
|---------------|------------------------------------------------------------|----------|------------------------------------------------------|
|               |                                                            |          |                                                      |
| Cohort        | Tetanus toxoid -<br>Simultaneous tetanus<br>and diphtheria | NR       | CAPS (cryopyrin-<br>associated periodic<br>syndrome) |
| Cohort        | Tetanus toxoid<br>(simultaneous PPSV23)                    | NR       | RA                                                   |
|               |                                                            |          |                                                      |

| <b>Number of participants</b> | <b>Age in years: mean (SD) or median (interquartile range)</b> | <b>% Women</b> | <b>Disease duration in years: mean (SD) or median (interquartile range)</b> |
|-------------------------------|----------------------------------------------------------------|----------------|-----------------------------------------------------------------------------|
|                               |                                                                |                |                                                                             |
| 12 CAPS                       | 24 (13)                                                        | 55             | 19 (12) [symptom duration]                                                  |
| MTX 27<br>TCZ+MTX 54          | 51.4 (9.5)<br>51.1 (8.9)                                       | 81.5<br>75.9   | 8.4 (7.0)<br>13.2 (11.5)                                                    |
|                               |                                                                |                |                                                                             |

| <b>Follow-up</b> | <b>Medication</b> | <b>Outcome (efficacy, immunogenicity, safety)</b> | <b>Type of study Oxford Centre - Immunogenicity</b> |
|------------------|-------------------|---------------------------------------------------|-----------------------------------------------------|
|                  |                   |                                                   |                                                     |
| NA               | Canakinumab       | Safety                                            | NA                                                  |
| 8w               | TCZ, MTX          | Immunogenicity, safety                            | 2b                                                  |
|                  |                   |                                                   |                                                     |

| Type of study Oxford Centre - Efficacy | Type of study Oxford Centre - Safety | Other comments                                      | Table used for validity assessment |
|----------------------------------------|--------------------------------------|-----------------------------------------------------|------------------------------------|
|                                        |                                      |                                                     |                                    |
| NA                                     | 4                                    | all 5 serious AE associated with pneum vaccination' | Table IV                           |
| NA                                     | 4                                    |                                                     | Table IV                           |
|                                        |                                      |                                                     |                                    |

| Table IV                              |                                        |                                                |                                                   |
|---------------------------------------|----------------------------------------|------------------------------------------------|---------------------------------------------------|
| Are the study groups clearly defined? | Selection bias sufficiently prevented? | Exposition to vaccination accurately measured? | Outcomes clearly defined and accurately analyzed? |
|                                       |                                        |                                                |                                                   |
| Yes                                   | Unclear                                | Yes                                            | Moderately. No details on how data was retrieved  |
| Yes, but no HC                        | Patients from RCT                      | NA                                             | Yes                                               |
|                                       |                                        |                                                |                                                   |

| <b>Outcome assessment blinded for exposition to vaccination?</b> | <b>Sufficient f/u?</b>  | <b>Prevention of selective loss of f/u?</b> | <b>Important confounders identified and corrected for?</b> |
|------------------------------------------------------------------|-------------------------|---------------------------------------------|------------------------------------------------------------|
|                                                                  |                         |                                             |                                                            |
| NA                                                               | Unknown. Not specified. | NA. Observational, retrospective analysis.  | NA.                                                        |
| NA                                                               | Yes                     | Yes                                         | Only for age and treatment with TCZ                        |
|                                                                  |                         |                                             |                                                            |

| Table II         |                                |                               |                      |
|------------------|--------------------------------|-------------------------------|----------------------|
| Method of random | Treatment allocation concealed | Similar group prognostic sign | Eligibility criteria |
|                  |                                |                               |                      |
|                  |                                |                               |                      |
|                  |                                |                               |                      |
|                  |                                |                               |                      |

| Outcome assessor blinded | care provided blinded | Was the patient blinded ? | Was follow up completed |
|--------------------------|-----------------------|---------------------------|-------------------------|
|                          |                       |                           |                         |
|                          |                       |                           |                         |
|                          |                       |                           |                         |
|                          |                       |                           |                         |



|                                                     |                                 | Table I                     |                                   |
|-----------------------------------------------------|---------------------------------|-----------------------------|-----------------------------------|
| Were the points estimates and variability presented | Did the analysis include an ITT | Literature search accurate? | Selection of literature accurate? |
|                                                     |                                 |                             |                                   |
|                                                     |                                 |                             |                                   |
|                                                     |                                 |                             |                                   |
|                                                     |                                 |                             |                                   |

| Critical appraisal of included articles accurate? | Data extraction accurately described? | Important features of included trials accurately described? | Heterogeneity between studies handled |
|---------------------------------------------------|---------------------------------------|-------------------------------------------------------------|---------------------------------------|
|                                                   |                                       |                                                             |                                       |
|                                                   |                                       |                                                             |                                       |
|                                                   |                                       |                                                             |                                       |

| Is statistical pooling correctly performed? |
|---------------------------------------------|
|                                             |
|                                             |
|                                             |
|                                             |

| Name first author                | Year of publication | Country     | Years of data inclusion |
|----------------------------------|---------------------|-------------|-------------------------|
| <b>HERPES ZOSTER VACCINATION</b> |                     |             |                         |
| Winthrop                         | 2017                | US          | 2014-15                 |
| Russell                          | 2015                | NA, Europe  | 2007-10                 |
| Koh                              | 2018                | South Korea | 2014-15                 |
| Zhang                            | 2012                | USA         | 2006-9                  |
| Yun                              | 2017                | USA         | 2006-13                 |
| Guthridge                        | 2013                | USA         | 2012                    |
|                                  |                     |             |                         |

| Type of study          | Vaccine  | Adjuvant | Type of AIIRD       |
|------------------------|----------|----------|---------------------|
|                        |          |          |                     |
| Cohort                 | Zostavax | NR       | RA                  |
| RCT                    | Zostavax | NR       | CS treated          |
| Cohort                 | Zostavax | NA       | RA                  |
| Cohort                 | Zostavax | NR       | RA,PsA,AS, IBD, PSO |
| Cohort - Medicare data | Zostavax | NA       | RA,PsA,AS, IBD, PSO |
| Cohort                 | Zostavax | NA       | SLE                 |
|                        |          |          |                     |

| Number of participants                                                    | Age in years: mean (SD) or median ([interquartile]) | % Women                           | Disease duration in years: mean (SD) or median ([interquartile]) |
|---------------------------------------------------------------------------|-----------------------------------------------------|-----------------------------------|------------------------------------------------------------------|
|                                                                           |                                                     |                                   |                                                                  |
| RA Tofacitinib 55<br>RA Placebo 57                                        | 61.7 (6.2)<br>62 (8.7)                              | 66.7<br>76.4                      | NR                                                               |
| 207 Zostavax<br>102 Placebo                                               | 69.8 (6.9)<br>69.9 (7.2)                            | 67.6<br>78.4                      | NR                                                               |
| RA 41<br>OA 28                                                            | 60 (55-63)<br>62 (58-67)                            | 92.7<br>85.7                      | 7.5 (2.4-14.6)                                                   |
| 292169 RA, 11030<br>PsA, 4026 AS, 66751<br>IBD, 89565 PSO, total<br>57790 | 74 (8)                                              | 72.3                              | NR                                                               |
| 59627 (53.1% RA,<br>1.4% AS, 20.9% IBD,<br>31.6% PSO, 4.7% PsA)           | 73.5 (7.3)<br>73.5 (7.3)                            | RA vacc :69.7<br>RA non vacc:69.7 | NR                                                               |
| 10 SLE<br>10 HC                                                           | 60.5 (5.4)<br>55.3 (4.2)                            | 100<br>100                        | NR                                                               |
|                                                                           |                                                     |                                   |                                                                  |

| Follow-up                                       | Medication                                                      | Outcome (efficacy, immunogenicity, safety) | Type of study Oxford Centre - Immunogenicity |
|-------------------------------------------------|-----------------------------------------------------------------|--------------------------------------------|----------------------------------------------|
|                                                 |                                                                 |                                            |                                              |
| 2,6,14 w                                        | MTX, tofacitinib                                                | Immunogenicity, safety                     | 2b                                           |
| 182d safety                                     | CS                                                              | Immunogenicity, safety                     | 2b                                           |
| 12 weeks                                        | GC 61%, MTX 92.7%, sulfasalazine 7.3%, leflunomide 22%, HCQ 22% | Immunogenicity, safety                     | 2b                                           |
| 2 (0.8-3) Median                                | 741 anti-TNF, 107 non-TNF, 1184 cDMARDs                         | Efficacy and safety                        | NA                                           |
| Yearly analysis after vaccination up to 7 years | Biologic: 11%, DMARD 46.1%, GC 16,5%                            | Efficacy                                   | NA                                           |
| 12 weeks                                        | 4 GC, 7 HCQ, 2 MTX                                              | Immunogenicity, safety                     | 2b                                           |
|                                                 |                                                                 |                                            |                                              |

| Type of study Oxford Centre - Efficacy | Type of study Oxford Centre - Safety | Other comments                                                                            | Table used for validity assessment |
|----------------------------------------|--------------------------------------|-------------------------------------------------------------------------------------------|------------------------------------|
|                                        |                                      |                                                                                           |                                    |
| NA                                     | 4                                    |                                                                                           | Table IV                           |
| NA                                     | 4                                    | Is RCT, but was downgraded. Only humoral response,<br><small>but not the clinical</small> | Table II                           |
| NA                                     | 4                                    |                                                                                           | Table IV                           |
| 2b                                     | 4                                    |                                                                                           | Table IV                           |
| 2b                                     | NA                                   |                                                                                           | Table IV                           |
| NA                                     | 4                                    |                                                                                           | Table IV                           |
|                                        |                                      |                                                                                           |                                    |



| Table IV                              |                                        |                                                           |                                                             |
|---------------------------------------|----------------------------------------|-----------------------------------------------------------|-------------------------------------------------------------|
| Are the study groups clearly defined? | Selection bias sufficiently prevented? | Exposition to vaccination accurately                      | Outcomes clearly defined and accurately analyzed?           |
| Yes, no HC                            | Yes, candidates of RCT                 | Yes                                                       | Yes                                                         |
| Yes                                   | Yes                                    | NA (all were vaccinated)                                  | Moderately (Humoral immunity using index value for VZV-IgG, |
| Yes                                   | Yes                                    | Moderately (Case definition relied on the assumption that | Yes                                                         |
| Yes                                   | Yes                                    | Moderately (Case definition relied on the assumption that | Yes                                                         |
| Yes                                   | Yes                                    | NA (all were vaccinated)                                  | Yes                                                         |

| Outcome assessment blinded for exposition to | Sufficient f/u?      | Prevention of selective loss of f/u? | Important confounders identified and                      |
|----------------------------------------------|----------------------|--------------------------------------|-----------------------------------------------------------|
|                                              |                      |                                      |                                                           |
| Yes                                          | Yes                  | Yes                                  | Yes                                                       |
|                                              |                      |                                      |                                                           |
| No - all vaccinated                          | Moderately: 3 months | Yes: no loss                         | Yes                                                       |
| NA                                           | Yes (median 2 years) | NA                                   | Yes                                                       |
| NA                                           | Yes                  | NA                                   | Yes. Matched vacc:unvacc 1:2                              |
| No - all vaccinated                          | Moderately: 3 months | Yes: no loss                         | No: SLE patients significantly older (60.5 vs 55.3 years) |
|                                              |                      |                                      |                                                           |

| Table II         |                                |                               |                      |
|------------------|--------------------------------|-------------------------------|----------------------|
| Method of random | Treatment allocation concealed | Similar group prognostic sign | Eligibility criteria |
|                  |                                |                               |                      |
|                  |                                |                               |                      |
| Yes              | Yes                            | Yes                           | Yes                  |
|                  |                                |                               |                      |
|                  |                                |                               |                      |
|                  |                                |                               |                      |
|                  |                                |                               |                      |
|                  |                                |                               |                      |
|                  |                                |                               |                      |

| Outcome assessor blinded | care provided blinded | Was the patient blinded ? | Was follow up completed |
|--------------------------|-----------------------|---------------------------|-------------------------|
|                          |                       |                           |                         |
|                          |                       |                           |                         |
| Yes                      | Yes                   | Yes                       | Yes                     |
|                          |                       |                           |                         |
|                          |                       |                           |                         |
|                          |                       |                           |                         |
|                          |                       |                           |                         |
|                          |                       |                           |                         |
|                          |                       |                           |                         |

|                                                                              |                                 | Table I                     |                                   |
|------------------------------------------------------------------------------|---------------------------------|-----------------------------|-----------------------------------|
| Were the points estimates and variability presented for the primary outcome? | Did the analysis include an ITT | Literature search accurate? | Selection of literature accurate? |
|                                                                              |                                 |                             |                                   |
|                                                                              |                                 |                             |                                   |
| Yes                                                                          | No                              |                             |                                   |
|                                                                              |                                 |                             |                                   |
|                                                                              |                                 |                             |                                   |
|                                                                              |                                 |                             |                                   |
|                                                                              |                                 |                             |                                   |
|                                                                              |                                 |                             |                                   |
|                                                                              |                                 |                             |                                   |

| Critical appraisal of included articles accurate? | Data extraction accurately described? | Important features of included trials accurately | Heterogeneity between studies handled |
|---------------------------------------------------|---------------------------------------|--------------------------------------------------|---------------------------------------|
|                                                   |                                       |                                                  |                                       |
|                                                   |                                       |                                                  |                                       |
|                                                   |                                       |                                                  |                                       |
|                                                   |                                       |                                                  |                                       |
|                                                   |                                       |                                                  |                                       |
|                                                   |                                       |                                                  |                                       |
|                                                   |                                       |                                                  |                                       |
|                                                   |                                       |                                                  |                                       |

|                                                    |
|----------------------------------------------------|
|                                                    |
| <b>Is statistical pooling correctly performed?</b> |
|                                                    |
|                                                    |
|                                                    |
|                                                    |
|                                                    |
|                                                    |
|                                                    |
|                                                    |
|                                                    |
|                                                    |

| Name first author                   | Year of publication | Country         | Years of data inclusion |
|-------------------------------------|---------------------|-----------------|-------------------------|
| <b>YELLOW FEVER<br/>VACCINATION</b> |                     |                 |                         |
| Kerneis                             | 2013                | France          | 2008-11                 |
| Wieten                              | 2016                | The Netherlands | NR                      |
| Oliveira                            | 2015                | Brazil          | 2007-8                  |
| Sheinberg                           | 2010                | Brazil          | NR                      |
|                                     |                     |                 |                         |



| Type of study | Vaccine          | Adjuvant | Type of AIIRD                                                                    |
|---------------|------------------|----------|----------------------------------------------------------------------------------|
|               |                  |          |                                                                                  |
| Cohort        | YF               | NR       | RA (and non-AIIRD CS-treated)                                                    |
| Case series   | 17D Yellow Fever | No       | 15 heterogeneous immunocompromised, also non-AIIRD: 4 RA, 2 SSc, 2 SLE, 2 IPD, 1 |
| Case series   | YF               | NR       | 23 RA<br>5 SLE<br>2 SSc<br>1 AC                                                  |
| Case series   | YF               | NR       | RA                                                                               |
|               |                  |          |                                                                                  |

| Number of participants                                              | Age in years: mean (SD) or median ([interquartile] range) | % Women  | Disease duration in years: mean (SD) or median ([interquartile] range) |
|---------------------------------------------------------------------|-----------------------------------------------------------|----------|------------------------------------------------------------------------|
|                                                                     |                                                           |          |                                                                        |
| CS 34*<br>Non CS 68<br>* CS treated-RA (n=9)<br>Non AHRD CS treated | 55 (43-59)<br>55 (46-61)                                  | 65<br>57 | NR                                                                     |
| 15 immunocompromised<br>30 HC                                       | Range 20-65<br>range 23-69                                | 80<br>67 | NR                                                                     |
| 31                                                                  | 46.7 (12.7)                                               | 100      | NR                                                                     |
| 17 RA anti-TNF<br>15 HC                                             | Range 26-58                                               | 76       | NR                                                                     |
|                                                                     |                                                           |          |                                                                        |

| <b>Follow-up</b>         | <b>Medication</b>              | <b>Outcome (efficacy, immunogenicity, safety)</b> | <b>Type of study Oxford Centre - Immunogenicity</b> |
|--------------------------|--------------------------------|---------------------------------------------------|-----------------------------------------------------|
|                          |                                |                                                   |                                                     |
| 10d safety<br>6 months   | CS                             | Immunogenicity, safety                            | 2b                                                  |
| Vacc 0-22y ago           | GC, MTX, biologics, tacrolimus | Immunogenicity, safety                            | 4                                                   |
| 2y                       | MTX 16, LEF 9                  | Immunogenicity, safety                            | 4                                                   |
| not clear, retrospective | Anti-TNF+MTX                   | Immunogenicity, safety                            | 4                                                   |
|                          |                                |                                                   |                                                     |

| Type of study Oxford Centre - Efficacy | Type of study Oxford Centre - Safety | Other comments | Table used for validity assessment |
|----------------------------------------|--------------------------------------|----------------|------------------------------------|
|                                        |                                      |                |                                    |
| NA                                     | 4                                    |                | Table IV                           |
| NA                                     | 4                                    |                | Table IV                           |
| NA                                     | 4                                    |                | Table IV                           |
| NA                                     | 4                                    |                | Table IV                           |
|                                        |                                      |                |                                    |

| Table IV                                                           |                                        |                                                |                                                   |
|--------------------------------------------------------------------|----------------------------------------|------------------------------------------------|---------------------------------------------------|
| Are the study groups clearly defined?                              | Selection bias sufficiently prevented? | Exposition to vaccination accurately measured? | Outcomes clearly defined and accurately analyzed? |
|                                                                    |                                        |                                                |                                                   |
| Yes, but CS-use based, not disease based. Includes also non AIIRDs | Not clear                              | NA                                             | Yes                                               |
| Yes (characteristics HC in supplemental data)                      | Yes                                    | Yes, in report                                 | Yes                                               |
| Yes, but small heterogeneous group                                 | Yes                                    | NA                                             | Yes                                               |
| Retrospective, small group                                         | Probably                               | NA                                             | Yes                                               |
|                                                                    |                                        |                                                |                                                   |

| Outcome assessment blinded for exposition to vaccination? | Sufficient f/u?           | Prevention of selective loss of f/u? | Important confounders identified and corrected for?                                |
|-----------------------------------------------------------|---------------------------|--------------------------------------|------------------------------------------------------------------------------------|
|                                                           |                           |                                      |                                                                                    |
| NA                                                        | Yes                       | No                                   | Yes                                                                                |
| NA (all vaccinated)                                       | No. Very long and varied. | NA                                   | Yes, matched controls                                                              |
| NA                                                        | Yes                       | Yes                                  | No analysis of confounding factors (not possible in such a small and heterogeneous |
| NA                                                        | Yes                       | Not indicated                        | No analysis of confounding factors (not possible in such a small and heterogeneous |
|                                                           |                           |                                      |                                                                                    |

| Table II         |                                |                               |                      |
|------------------|--------------------------------|-------------------------------|----------------------|
| Method of random | Treatment allocation concealed | Similar group prognostic sign | Eligibility criteria |
|                  |                                |                               |                      |
|                  |                                |                               |                      |
|                  |                                |                               |                      |
|                  |                                |                               |                      |
|                  |                                |                               |                      |
|                  |                                |                               |                      |
|                  |                                |                               |                      |
|                  |                                |                               |                      |
|                  |                                |                               |                      |

| Outcome assessor blinded | care provided blinded | Was the patient blinded ? | Was follow up completed |
|--------------------------|-----------------------|---------------------------|-------------------------|
|                          |                       |                           |                         |
|                          |                       |                           |                         |
|                          |                       |                           |                         |
|                          |                       |                           |                         |
|                          |                       |                           |                         |
|                          |                       |                           |                         |
|                          |                       |                           |                         |
|                          |                       |                           |                         |
|                          |                       |                           |                         |



|                                                                              |                                 | Table I                     |                                   |
|------------------------------------------------------------------------------|---------------------------------|-----------------------------|-----------------------------------|
| Were the points estimates and variability presented for the primary outcome? | Did the analysis include an ITT | Literature search accurate? | Selection of literature accurate? |
|                                                                              |                                 |                             |                                   |
|                                                                              |                                 |                             |                                   |
|                                                                              |                                 |                             |                                   |
|                                                                              |                                 |                             |                                   |
|                                                                              |                                 |                             |                                   |
|                                                                              |                                 |                             |                                   |
|                                                                              |                                 |                             |                                   |

| Critical appraisal of included articles accurate? | Data extraction accurately described? | Important features of included trials accurately described? | Heterogeneity between studies handled accurately?/Meta-analysis adequately |
|---------------------------------------------------|---------------------------------------|-------------------------------------------------------------|----------------------------------------------------------------------------|
|                                                   |                                       |                                                             |                                                                            |
|                                                   |                                       |                                                             |                                                                            |
|                                                   |                                       |                                                             |                                                                            |
|                                                   |                                       |                                                             |                                                                            |
|                                                   |                                       |                                                             |                                                                            |
|                                                   |                                       |                                                             |                                                                            |

| Is statistical pooling correctly performed? |
|---------------------------------------------|
|                                             |
|                                             |
|                                             |
|                                             |
|                                             |
|                                             |
|                                             |
|                                             |

| Name first author                               | Year of publication | Country       | Years of data inclusion |
|-------------------------------------------------|---------------------|---------------|-------------------------|
| <b>HUMAN<br/>PAPILLOMAVIRUS<br/>VACCINATION</b> |                     |               |                         |
| Dhar                                            | 2017                | United States | NR                      |
| Dhar                                            | 2018                | United States | NR                      |
| Mok                                             | 2013                | China         | 2011                    |
| Mok                                             | 2018                | China         | 2011                    |
| Esposito                                        | 2014                | Italy         | NR                      |
| Soybilgic                                       | 2013                | United States | NR                      |
|                                                 |                     |               |                         |

| Type of study        | Vaccine                 | Adjuvant                          | Type of AIIRD |
|----------------------|-------------------------|-----------------------------------|---------------|
|                      |                         |                                   |               |
| prospective cohort   | 4-valent HPV (gardasil) | Aluminum Hydroxyphosphate Sulfate | SLE           |
| prospective cohort   | 4-valent HPV (gardasil) | Aluminum Hydroxyphosphate Sulfate | SLE           |
| Cohort study         | 4-valent HPV (gardasil) | Aluminum Hydroxyphosphate Sulfate | SLE           |
| Cohort               | 4-valent HPV (gardasil) | Aluminum Hydroxyphosphate Sulfate | SLE           |
| Cohort               | 2-valent HPV            | AS04                              | JIA           |
| Cohort (prospective) | 4-valent HPV (gardasil) | Aluminum Hydroxyphosphate Sulfate | jSLE          |
|                      |                         |                                   |               |

| <b>Number of participants</b> | <b>Age in years: mean (SD) or median ([interquartile] range)</b> | <b>% Women</b> | <b>Disease duration in years: mean (SD) or median ([interquartile]</b> |
|-------------------------------|------------------------------------------------------------------|----------------|------------------------------------------------------------------------|
|                               |                                                                  |                |                                                                        |
| 34 SLE                        | 38.1                                                             | 100            | 9.5                                                                    |
| 34 SLE                        | 38.1                                                             | 100            | 9.5                                                                    |
| SLE-vacc 50                   | 25.8 (3.9)                                                       | 100            | 6.6 (4.5)                                                              |
| HC 50                         | 25.8 (3.9)                                                       | 100            |                                                                        |
| SLE disease control           | 26.6 (4.4)                                                       |                | 7.5 (3.5)                                                              |
| SLE 50                        | 25.8 (3.9)                                                       | 100            | 6.6 (4,5)                                                              |
| Non-vacc 50                   | 25.8 (3.9)                                                       | 100            |                                                                        |
| JIA 21                        | 15.0 (12.0-25.0)                                                 | 100            | 5 (1-15)                                                               |
| HC 21                         | 15.0 (12.0-25.0)                                                 | 100            |                                                                        |
| 27 jSLE                       | 20.5                                                             | 100            | 3.5                                                                    |
|                               |                                                                  |                |                                                                        |

| Follow-up | Medication                                                   | Outcome (efficacy, immunogenicity, safety)                      | Type of study Oxford Centre - Immunogenicity |
|-----------|--------------------------------------------------------------|-----------------------------------------------------------------|----------------------------------------------|
|           |                                                              |                                                                 |                                              |
| 12M       | NR                                                           | Immunogenicity, safety (AE)                                     | 2b                                           |
| 7m        | NR                                                           | Immunogenicity (neutralizing Ig) in relation to preceding       | 2b                                           |
| 12m       | HCQ (66%), GC (70%, 4.8 ± 2mg/day max 10 mg), AZA (48%), CsA | Immunogenicity, safety (AE, flare)                              | 2b                                           |
| 12m       | HCQ (66%), GC (70%, 4.8 ± 2mg/day max 10 mg), AZA (48%), CsA | Immunogenicity                                                  | 2b                                           |
| 7m        | MTX (23.8%), ETA (28.6%)                                     | Immunogenicity (neutralizing Ig), safety (AE, disease activity) | 2b                                           |
| 7M        | HCQ (100%), GCs (59.2%), AZA (33.3%), MMF (33.3%), MTX       | Immunogenicity, safety (AE, flare)                              | 4                                            |
|           |                                                              |                                                                 |                                              |

| Type of study Oxford Centre - Efficacy | Type of study Oxford Centre - Safety | Other comments                | Table used for validity assessment |
|----------------------------------------|--------------------------------------|-------------------------------|------------------------------------|
|                                        |                                      |                               |                                    |
| NA                                     | NA                                   | 2 papers on the same patients | Table IV                           |
| NA                                     | NA                                   | relevance?                    | Table IV                           |
| NA                                     | 4                                    |                               | Table IV                           |
| NA                                     | NA                                   |                               | Table IV                           |
| ND                                     | 4                                    |                               | Table IV                           |
| ND                                     | 4                                    |                               | Table IV                           |
|                                        |                                      |                               |                                    |



| Table IV                              |                                        |                                                |                                                   |
|---------------------------------------|----------------------------------------|------------------------------------------------|---------------------------------------------------|
| Are the study groups clearly defined? | Selection bias sufficiently prevented? | Exposition to vaccination accurately measured? | Outcomes clearly defined and accurately analyzed? |
|                                       |                                        |                                                |                                                   |
| Yes, no controls                      | Yes                                    | Yes                                            | Yes                                               |
| Yes, no controls                      | Yes                                    | Yes                                            | Yes                                               |
| Yes                                   | Yes                                    | Yes                                            | Yes for Ig, no systematic assessment of AE        |
| Yes                                   | Yes                                    | Yes                                            | Yes                                               |
| Yes                                   | selection not described                | Yes                                            | Yes                                               |
| Yes                                   | Moderate                               | Yes                                            | No, disease activity time of assessment unknown   |
|                                       |                                        |                                                |                                                   |

| Outcome assessment blinded for exposition to vaccination? | Sufficient f/u? | Prevention of selective loss of f/u?         | Important confounders identified and corrected for? |
|-----------------------------------------------------------|-----------------|----------------------------------------------|-----------------------------------------------------|
|                                                           |                 |                                              |                                                     |
| NA, all patients vaccinated                               | Yes             | Yes                                          | no (medication use unknown)                         |
| NA, all patients vaccinated                               | Yes             | Yes                                          | no (medication use unknown)                         |
| NA,                                                       | Yes             | only 39 SLE patients with available IgG data | Yes                                                 |
| NA, all patients vaccinated                               | Yes             | no                                           | no                                                  |
| NA, all patients vaccinated                               | Yes             | Yes                                          | Yes                                                 |
| NA, all patients vaccinated                               | Yes             | no                                           | no                                                  |
|                                                           |                 |                                              |                                                     |

| Table II         |                                |                               |                      |
|------------------|--------------------------------|-------------------------------|----------------------|
| Method of random | Treatment allocation concealed | Similar group prognostic sign | Eligibility criteria |
|                  |                                |                               |                      |
|                  |                                |                               |                      |
|                  |                                |                               |                      |
|                  |                                |                               |                      |
|                  |                                |                               |                      |
|                  |                                |                               |                      |
|                  |                                |                               |                      |
|                  |                                |                               |                      |
|                  |                                |                               |                      |

| Outcome assessor blinded | care provided blinded | Was the patient blinded ? | Was follow up completed |
|--------------------------|-----------------------|---------------------------|-------------------------|
|                          |                       |                           |                         |
|                          |                       |                           |                         |
|                          |                       |                           |                         |
|                          |                       |                           |                         |
|                          |                       |                           |                         |
|                          |                       |                           |                         |
|                          |                       |                           |                         |
|                          |                       |                           |                         |

|                                                     |                                 | Table I                     |                                   |
|-----------------------------------------------------|---------------------------------|-----------------------------|-----------------------------------|
| Were the points estimates and variability presented | Did the analysis include an ITT | Literature search accurate? | Selection of literature accurate? |
|                                                     |                                 |                             |                                   |
|                                                     |                                 |                             |                                   |
|                                                     |                                 |                             |                                   |
|                                                     |                                 |                             |                                   |
|                                                     |                                 |                             |                                   |
|                                                     |                                 |                             |                                   |
|                                                     |                                 |                             |                                   |
|                                                     |                                 |                             |                                   |
|                                                     |                                 |                             |                                   |

| Critical appraisal of included articles accurate? | Data extraction accurately described? | Important features of included trials accurately described? | Heterogeneity between studies handled |
|---------------------------------------------------|---------------------------------------|-------------------------------------------------------------|---------------------------------------|
|                                                   |                                       |                                                             |                                       |
|                                                   |                                       |                                                             |                                       |
|                                                   |                                       |                                                             |                                       |
|                                                   |                                       |                                                             |                                       |
|                                                   |                                       |                                                             |                                       |
|                                                   |                                       |                                                             |                                       |
|                                                   |                                       |                                                             |                                       |
|                                                   |                                       |                                                             |                                       |

| Is statistical pooling correctly performed? |
|---------------------------------------------|
|                                             |
|                                             |
|                                             |
|                                             |
|                                             |
|                                             |
|                                             |
|                                             |
|                                             |
|                                             |

| Name first author                                  | Year of publication | Country |
|----------------------------------------------------|---------------------|---------|
| <b>TICK-BORNE<br/>ENCEPHALITIS<br/>VACCINATION</b> |                     |         |
| Hertzell                                           | 2016                | Sweden  |



| <b>Years of data inclusion</b> | <b>Type of study</b> | <b>Vaccine</b>          |
|--------------------------------|----------------------|-------------------------|
|                                |                      |                         |
|                                | Cohort               | Tick-borne Encephalitis |

| Adjuvant | Type of AIIRD | Number of participants |
|----------|---------------|------------------------|
|          |               |                        |
| NR       | RA            | RA 65 + 1 AS<br>HC 56  |

| Age in years: mean (SD) or median ([interquartile] range) | % Women | Disease duration in years: mean (SD) or median ([interquartile] range) |
|-----------------------------------------------------------|---------|------------------------------------------------------------------------|
|                                                           |         |                                                                        |
| 58.5<br>58.5                                              | Matched |                                                                        |

| Follow-up | Medication        | Outcome (efficacy, immunogenicity, safety) |
|-----------|-------------------|--------------------------------------------|
|           |                   |                                            |
| 12m       | TNF, MTX, TNF+MTX | Immunogenicity, safety                     |

| Type of study Oxford Centre - Immunogenicity | Type of study Oxford Centre - Efficacy | Type of study Oxford Centre - Safety |
|----------------------------------------------|----------------------------------------|--------------------------------------|
|                                              |                                        |                                      |
| 2b                                           | NA                                     | 4                                    |

|                       |                                           |                                              |
|-----------------------|-------------------------------------------|----------------------------------------------|
|                       |                                           | Table IV                                     |
| <b>Other comments</b> | <b>Table used for validity assessment</b> | <b>Are the study groups clearly defined?</b> |
|                       |                                           |                                              |
|                       | Table IV                                  | Yes                                          |

| Selection bias sufficiently prevented? | Exposition to vaccination accurately measured? | Outcomes clearly defined and accurately analyzed? |
|----------------------------------------|------------------------------------------------|---------------------------------------------------|
|                                        |                                                |                                                   |
| Yes                                    | Yes                                            | Yes                                               |

| Outcome assessment blinded for exposition to vaccination? | Sufficient f/u? | Prevention of selective loss of f/u? |
|-----------------------------------------------------------|-----------------|--------------------------------------|
|                                                           |                 |                                      |
| No                                                        | Yes             | Yes                                  |



|                                                     | Table II         |                                |
|-----------------------------------------------------|------------------|--------------------------------|
| Important confounders identified and corrected for? | Method of random | Treatment allocation concealed |
|                                                     |                  |                                |
| Yes                                                 |                  |                                |

| <b>Similar group prognostic sign</b> | <b>Eligibility criteria</b> | <b>Outcome assessor blinded</b> |
|--------------------------------------|-----------------------------|---------------------------------|
|                                      |                             |                                 |
|                                      |                             |                                 |

| care provided blinded | Was the patient blinded ? | Was follow up completed |
|-----------------------|---------------------------|-------------------------|
|                       |                           |                         |
|                       |                           |                         |

|                                                                                     |                                        | Table I                            |
|-------------------------------------------------------------------------------------|----------------------------------------|------------------------------------|
| <b>Were the points estimates and variability presented for the primary outcome?</b> | <b>Did the analysis include an ITT</b> | <b>Literature search accurate?</b> |
|                                                                                     |                                        |                                    |
|                                                                                     |                                        |                                    |

| Selection of literature accurate? | Critical appraisal of included articles accurate? | Data extraction accurately described? |
|-----------------------------------|---------------------------------------------------|---------------------------------------|
|                                   |                                                   |                                       |
|                                   |                                                   |                                       |

| Important features of included trials accurately described? | Heterogeneity between studies handled accurately?/Meta-analysis | Is statistical pooling correctly performed? |
|-------------------------------------------------------------|-----------------------------------------------------------------|---------------------------------------------|
|                                                             |                                                                 |                                             |
|                                                             |                                                                 |                                             |
