# Supplementary material for: Efficacy, immunogenicity and safety of vaccination in adult patients with autoimmune inflammatory rheumatic diseases: a systematic literature review for the 2019 update of EULAR recommendations
Source: PubMed Central journal article supplement — RMD Open. 2019 Sep 9;5(2):e001035. doi: 10.1136/rmdopen-2019-001035 (PMC6744079; doi:10.1136/rmdopen-2019-001035), 2019-09-09
Supplement: rmdopen-2019-001035supp003.pdf [file rmdopen-2019-001035supp003.pdf]

## **CRITICAL APPRAISAL OF AVAILABLE EVIDENCE**

From: "Introduction to evidence-based medicine" by M. Offringa, W.J.J. Assendelft and R.J.P.M. Scholten  
Checklists from the Cochrane library

ARTICLE: .....

### **SHORT DESCRIPTION OF STUDY**

|                                                   |                                                                                                                                                                                                                                                                                                                                                                                         |
|---------------------------------------------------|-----------------------------------------------------------------------------------------------------------------------------------------------------------------------------------------------------------------------------------------------------------------------------------------------------------------------------------------------------------------------------------------|
| Type of study<br>(According to level of evidence) | 1. a) Systematic review / meta-analysis ( <i>table I</i> )<br>b) Randomized controlled trial ( <i>table II</i> )<br>2. a) Systematic review of cohort studies or case-control studies ( <i>table III</i> )<br>b) Cohort study or case-control study ( <i>table IV or V</i> )<br>c) "Outcome research" (i.e. descriptive study)<br>3. Patient series or case report<br>4. Expert opinion |
| Patients (and controls)                           |                                                                                                                                                                                                                                                                                                                                                                                         |
| Vaccination                                       |                                                                                                                                                                                                                                                                                                                                                                                         |
| Medications used                                  |                                                                                                                                                                                                                                                                                                                                                                                         |
| Primary outcome measures                          |                                                                                                                                                                                                                                                                                                                                                                                         |
| Secondary outcome measures                        |                                                                                                                                                                                                                                                                                                                                                                                         |

### **VALIDITY** (see appendix table I-IV for validity assessment of included studies)

Is this study valid? Yes / Moderate / No (*including case reports and expert opinions*)

### **RELEVANCE**

Are results applicable to juvenile patients? Yes / Possible / No / Unknown

### **RESULTS**

|                        |                                                 |
|------------------------|-------------------------------------------------|
| Outcome safety         | Patients:<br>Controls:<br>Influence medication: |
| Outcome immunogenicity | Patients:<br>Controls:<br>Influence medication: |

### **CONCLUSION**

Safety:

Immunogenicity:

Influence medication:

Are the effects significant and relevant?:

## APPENDIX: TABLES FOR VALIDITY ASSESMENT

Table I

**VALIDITY (SYSTEMATIC REVIEW OF RANDOMISED CONTROLLED TRIALS)**

|                                                   |                                                                 |                     |
|---------------------------------------------------|-----------------------------------------------------------------|---------------------|
| 1                                                 | Is the research question properly formulated?                   | Yes / No / Unknown  |
| 2                                                 | Is the literature search accurate?                              | Yes / No / Unknown  |
| 3                                                 | Is the selection of literature accurate?                        | Yes / No / Unknown  |
| 4                                                 | Is the critical appraisal of included articles accurate?        | Yes / No / Unknown  |
| 5                                                 | Is data extraction accurately described?                        | Yes / No / Unknown  |
| 6                                                 | Are important features of included trials accurately described? | Yes / No / Unknown  |
| 7                                                 | Is heterogeneity between studies handled accurately?            | Yes / No / Unknown  |
| 8                                                 | Is statistical pooling correctly performed?                     | Yes / No / Unknown  |
| Based on the above: <b>WAS THIS REVIEW VALID?</b> |                                                                 | Yes / Moderate / No |

Remarks:

Table II

**VALIDITY (RANDOMISED CONTROLLED TRIAL)**

|                                                  |                                                                                  |                                                                                      |
|--------------------------------------------------|----------------------------------------------------------------------------------|--------------------------------------------------------------------------------------|
| 1                                                | Was a method of randomisation performed?                                         | Yes / No / Unknown                                                                   |
| 2                                                | Was the treatment allocation concealed?                                          | Yes / No / Unknown                                                                   |
| 3                                                | Were the groups similar at baseline regarding important prognostic indicators?   | - Yes<br>- No, corrected in analysis<br>- No, not corrected in analysis<br>- Unknown |
| 4                                                | Were the groups, apart from the intervention, treated similarly?                 | Yes / No / Unknown                                                                   |
| 5                                                | Were eligibility criteria specified?                                             | Yes / No / Unknown                                                                   |
| 6                                                | Was the outcome assessor blinded?                                                | Yes / No / Unknown                                                                   |
| 7                                                | Was the care provider blinded?                                                   | Yes / No / Unknown                                                                   |
| 8                                                | Was the patient blinded?                                                         | Yes / No / Unknown                                                                   |
| 9                                                | Was follow-up complete? (i.e <20% loss to follow-up)                             | Yes / No / Unknown                                                                   |
| 10                                               | Were point estimates and variability measures presented for the primary outcome? | Yes / No / Unknown                                                                   |
| 11                                               | Did the analysis include an intention-to-treat analysis?                         | Yes / No / Unknown                                                                   |
| Based on the above: <b>WAS THIS STUDY VALID?</b> |                                                                                  | Yes / Moderate / No                                                                  |

Remarks:

*Table III*

| <b>VALIDITY (SYSTEMATIC REVIEW OF OBSERVATIONAL STUDIES)</b> |                                                                 |                     |
|--------------------------------------------------------------|-----------------------------------------------------------------|---------------------|
| 1                                                            | Is the research question properly formulated?                   | Yes / No / Unknown  |
| 2                                                            | Is the literature search accurate?                              | Yes / No / Unknown  |
| 3                                                            | Is the selection of literature accurate?                        | Yes / No / Unknown  |
| 4                                                            | Is the critical appraisal of included articles accurate?        | Yes / No / Unknown  |
| 5                                                            | Is data extraction accurately described?                        | Yes / No / Unknown  |
| 6                                                            | Are important features of included trials accurately described? | Yes / No / Unknown  |
| 7                                                            | Is the meta-analysis correctly performed?                       | Yes / No / Unknown  |
| Based on the above: <b>WAS THIS REVIEW VALID?</b>            |                                                                 | Yes / Moderate / No |
| Remarks:                                                     |                                                                 |                     |

*Table IV*

| <b>VALIDITY (COHORT STUDY)</b>                   |                                                                |                     |
|--------------------------------------------------|----------------------------------------------------------------|---------------------|
| 1                                                | Are the study groups clearly defined?                          | Yes / No / Unknown  |
| 2                                                | Was selection bias sufficiently prevented?                     | Yes / No / Unknown  |
| 3                                                | Was exposition to vaccination accurately measured?             | Yes / No / Unknown  |
| 4                                                | Were outcome measures clearly defined and accurately analyzed? | Yes / No / Unknown  |
| 5                                                | Was outcome assessment blinded for exposition to vaccination?  | Yes / No / Unknown  |
| 6                                                | Was the follow-up period sufficient to measure outcome?        | Yes / No / Unknown  |
| 7                                                | Was selective loss-to-follow-up sufficiently prevented?        | Yes / No / Unknown  |
| 8                                                | Were important confounders identified and corrected for?       | Yes / No / Unknown  |
| Based on the above: <b>WAS THIS STUDY VALID?</b> |                                                                | Yes / Moderate / No |
| Remarks:                                         |                                                                |                     |

*Table V*

| <b>VALIDITY (CASE CONTROL STUDY)</b>             |                                                                    |                     |
|--------------------------------------------------|--------------------------------------------------------------------|---------------------|
| 1                                                | Was the patient group clearly defined?                             | Yes / No / Unknown  |
| 2                                                | Was the control group clearly defined?                             | Yes / No / Unknown  |
| 3                                                | Was selection bias sufficiently prevented?                         | Yes / No / Unknown  |
| 4                                                | Was exposition to vaccination accurately measured?                 | Yes / No / Unknown  |
| 5                                                | Was exposition to vaccination assessed blinded for disease status? | Yes / No / Unknown  |
| 6                                                | Were important confounders identified and corrected for?           | Yes / No / Unknown  |
| Based on the above: <b>WAS THIS STUDY VALID?</b> |                                                                    | Yes / Moderate / No |
